# Supplementary material for: Synthesis and Biological Evaluation of Apigenin Derivatives as Antibacterial and Antiproliferative Agents
Source: PubMed Central journal article supplement (PMC6269912; doi:10.3390/molecules180911496), 2013-09-17

## Supplementary Materials

**Figure S1.**  $^1\text{H-NMR}$  spectrum (500 MHz,  $\text{DMSO-}d_6$ ) of 7-(2-bromoethoxy)-5-hydroxy-2-(4-hydroxyphenyl)-4H-chromen-4-one **2a**.

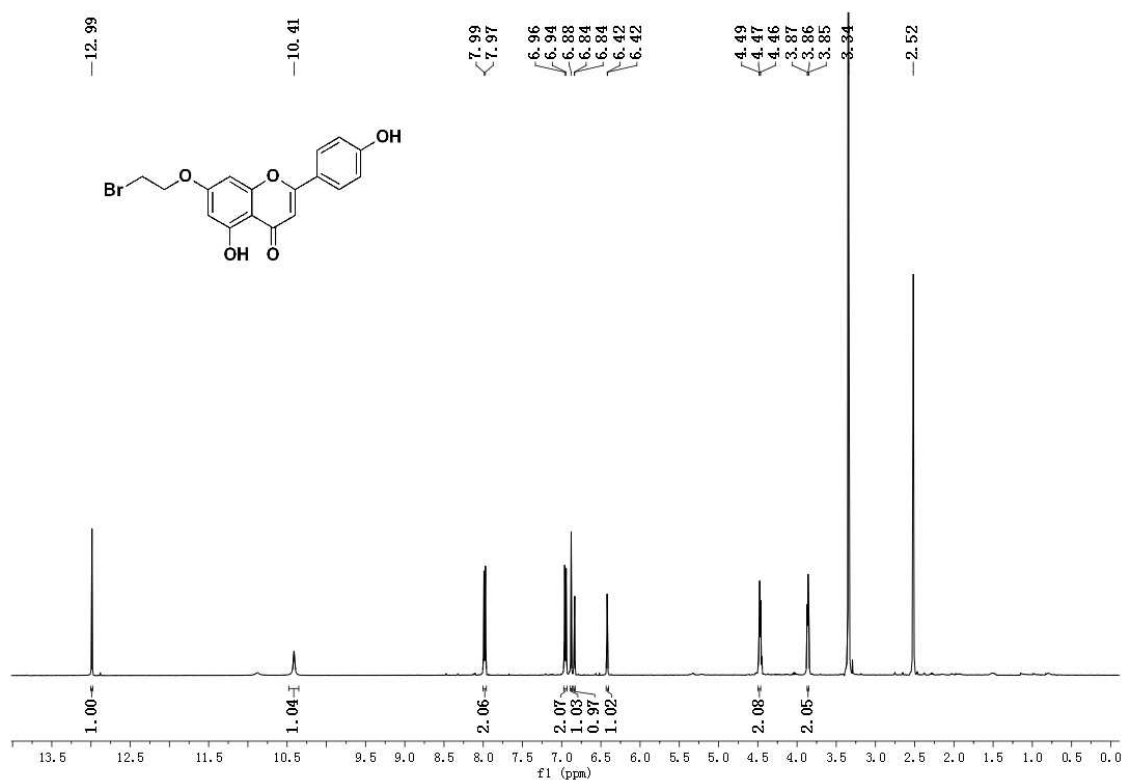

**Figure S2.**  $^{13}\text{C-NMR}$  spectrum (125 MHz,  $\text{DMSO-}d_6$ ) of 7-(2-bromoethoxy)-5-hydroxy-2-(4-hydroxyphenyl)-4H-chromen-4-one **2a**.

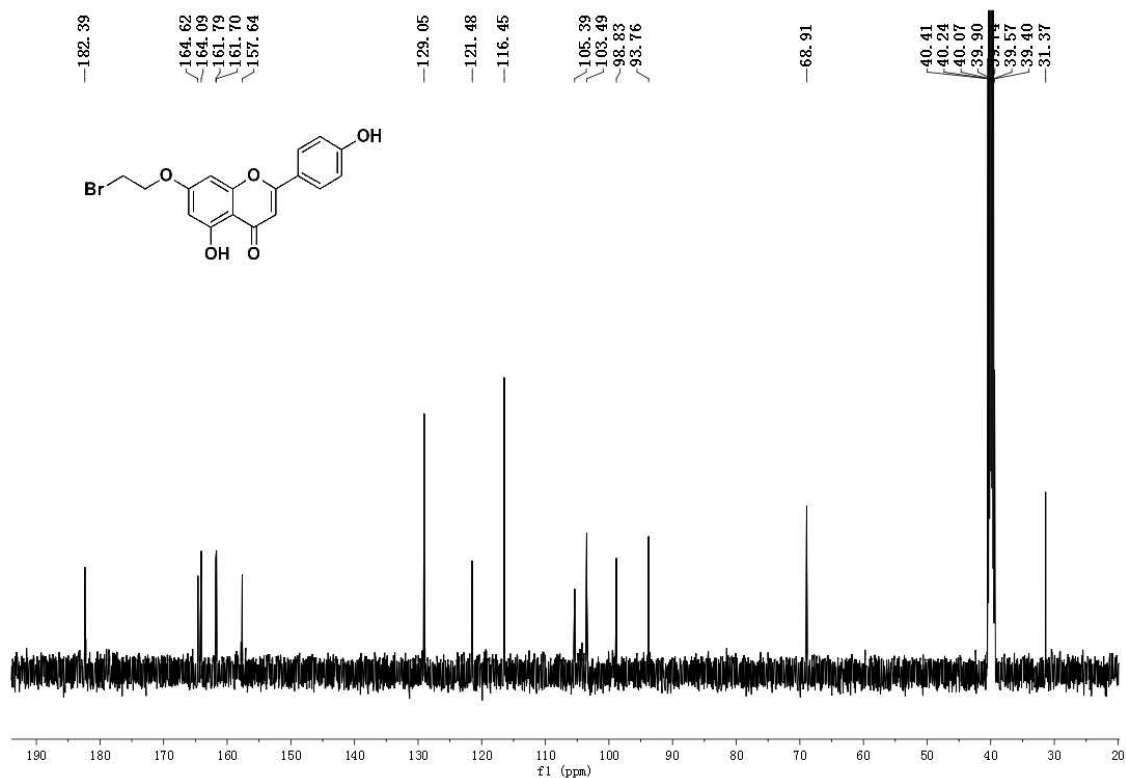

**Figure S3.**  $^1\text{H-NMR}$  spectrum (500 MHz,  $\text{DMSO-}d_6$ ) of 7-(3-bromopropoxy)-5-hydroxy-2-(4-hydroxyphenyl)-4H-chromen-4-one **2b**.

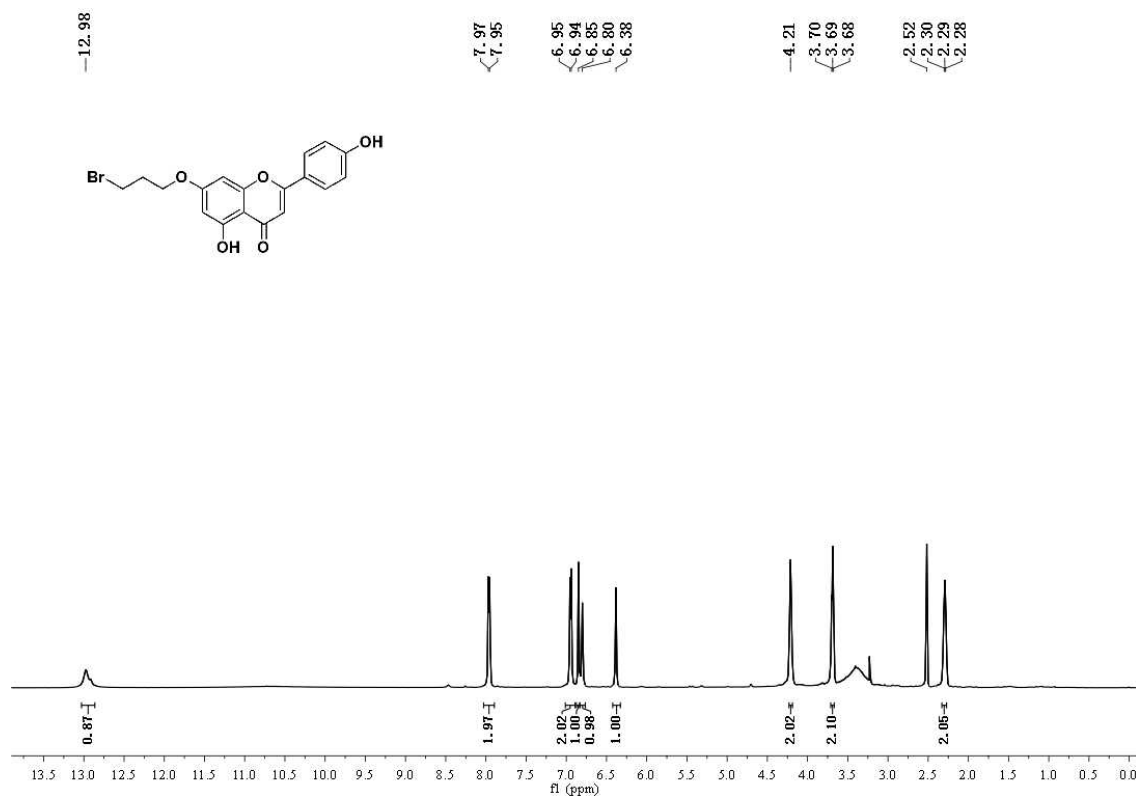

**Figure S4.**  $^{13}\text{C-NMR}$  spectrum (125 MHz,  $\text{DMSO-}d_6$ ) of 7-(3-bromopropoxy)-5-hydroxy-2-(4-hydroxyphenyl)-4H-chromen-4-one **2b**.

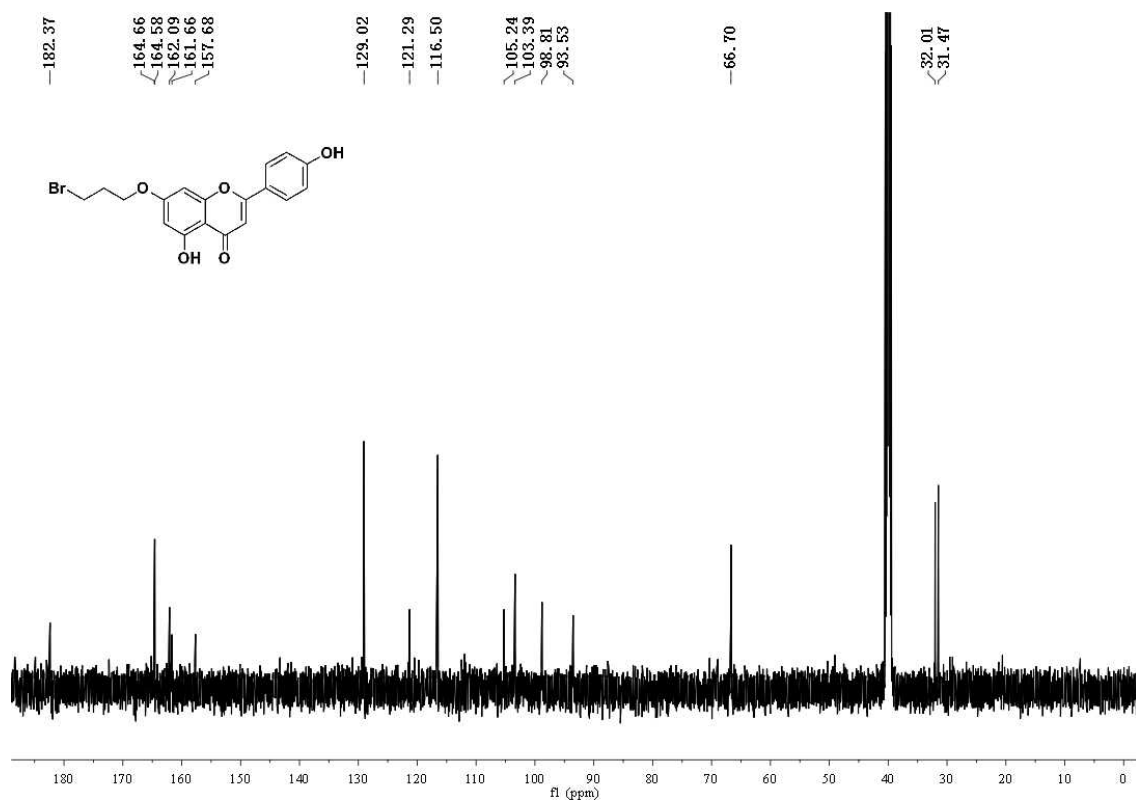

**Figure S5.**  $^1\text{H-NMR}$  spectrum (500 MHz,  $\text{DMSO-}d_6$ ) of 7-[2-(diethylamino)ethoxy]-5-hydroxy-2-(4-hydroxyphenyl)-4H-chromen-4-one **3a**.

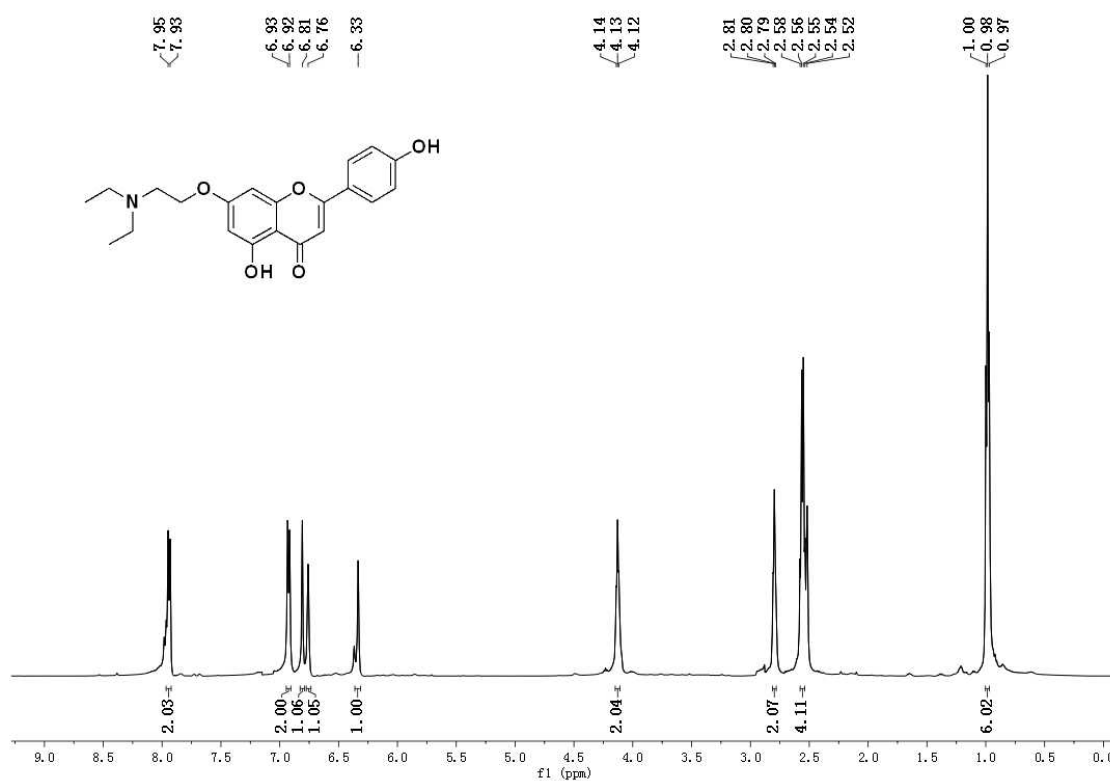

**Figure S6.**  $^{13}\text{C-NMR}$  spectrum (125 MHz,  $\text{DMSO-}d_6$ ) of 7-[2-(diethylamino)ethoxy]-5-hydroxy-2-(4-hydroxyphenyl)-4H-chromen-4-one **3a**.

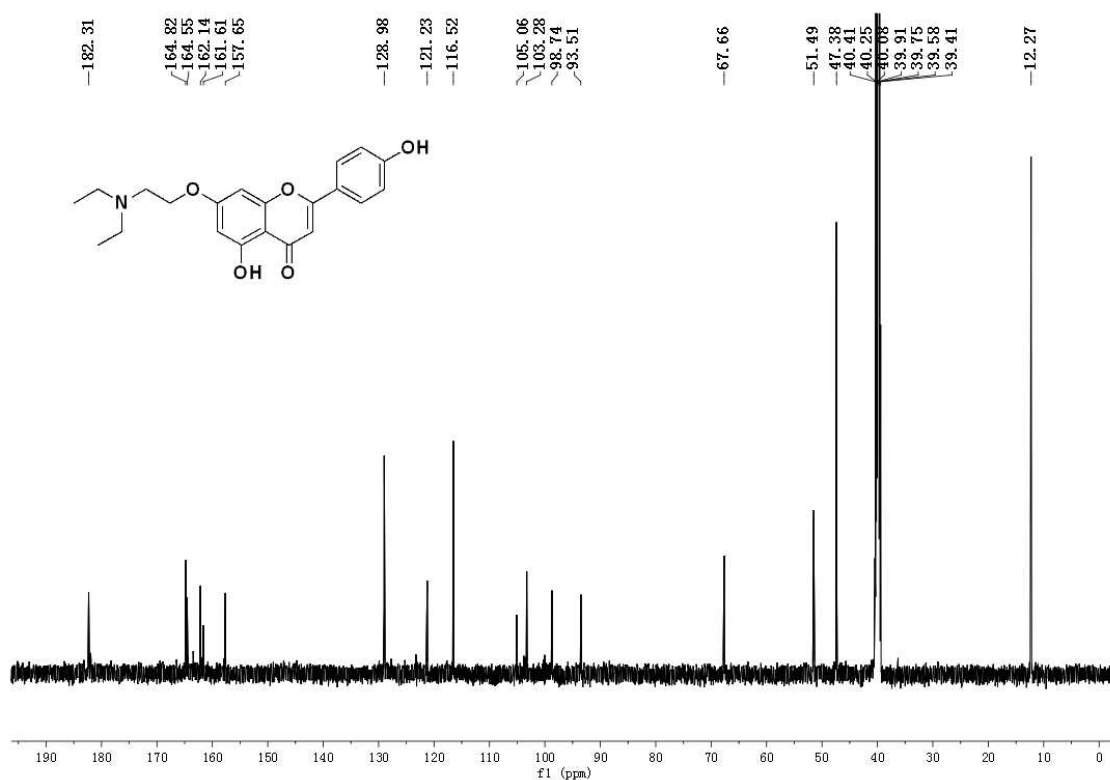

**Figure S7.**  $^1\text{H-NMR}$  spectrum (500 MHz,  $\text{DMSO-}d_6$ ) of 7-[2-(ethylamino)ethoxy]-5-hydroxy-2-(4-hydroxyphenyl)-4H-chromen-4-one **3b**.

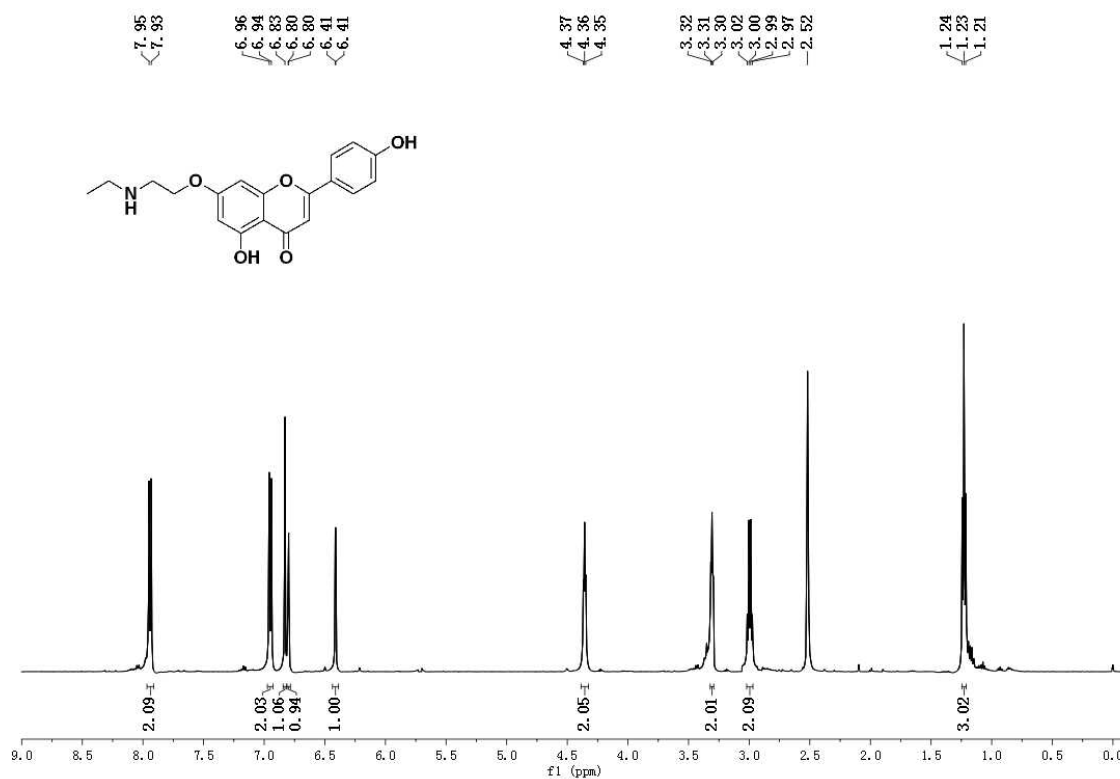

**Figure S8.**  $^{13}\text{C-NMR}$  spectrum (125 MHz,  $\text{DMSO-}d_6$ ) of 7-[2-(ethylamino)ethoxy]-5-hydroxy-2-(4-hydroxyphenyl)-4H-chromen-4-one **3b**.

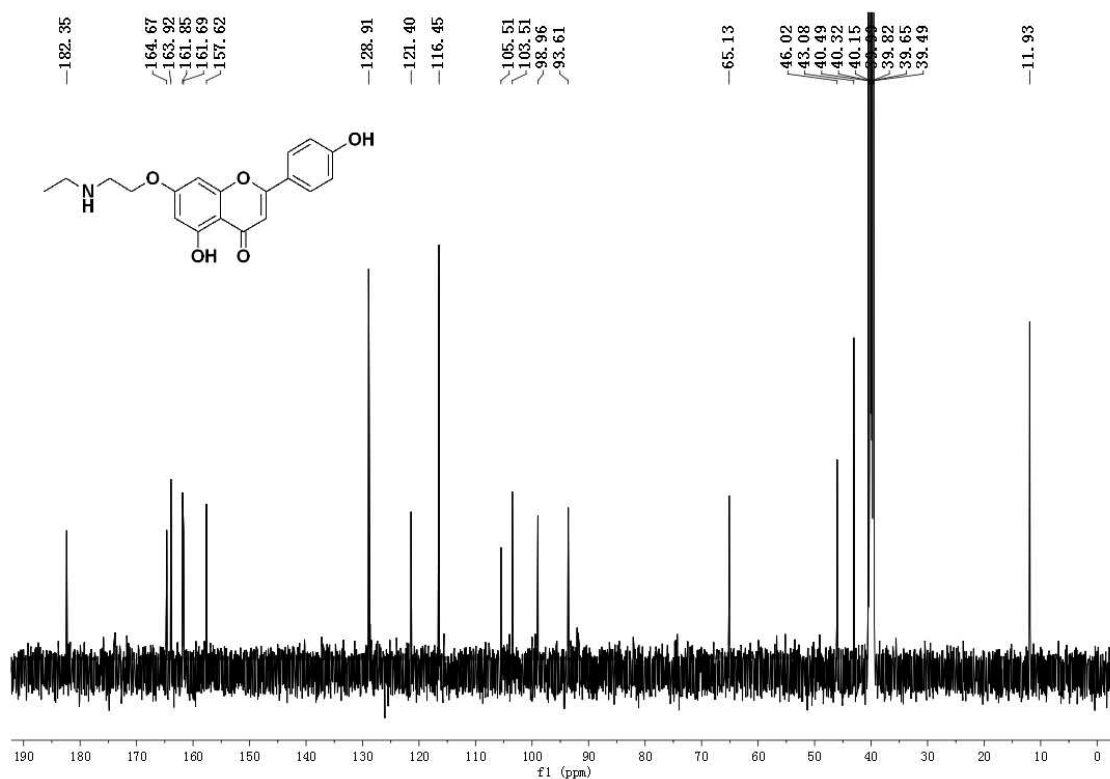

**Figure S9.**  $^1\text{H-NMR}$  spectrum (500 MHz,  $\text{DMSO-}d_6$ ) of 7-[2-(propylamino)ethoxy]-5-hydroxy-2-(4-hydroxyphenyl)-4H-chromen-4-one **3c**.

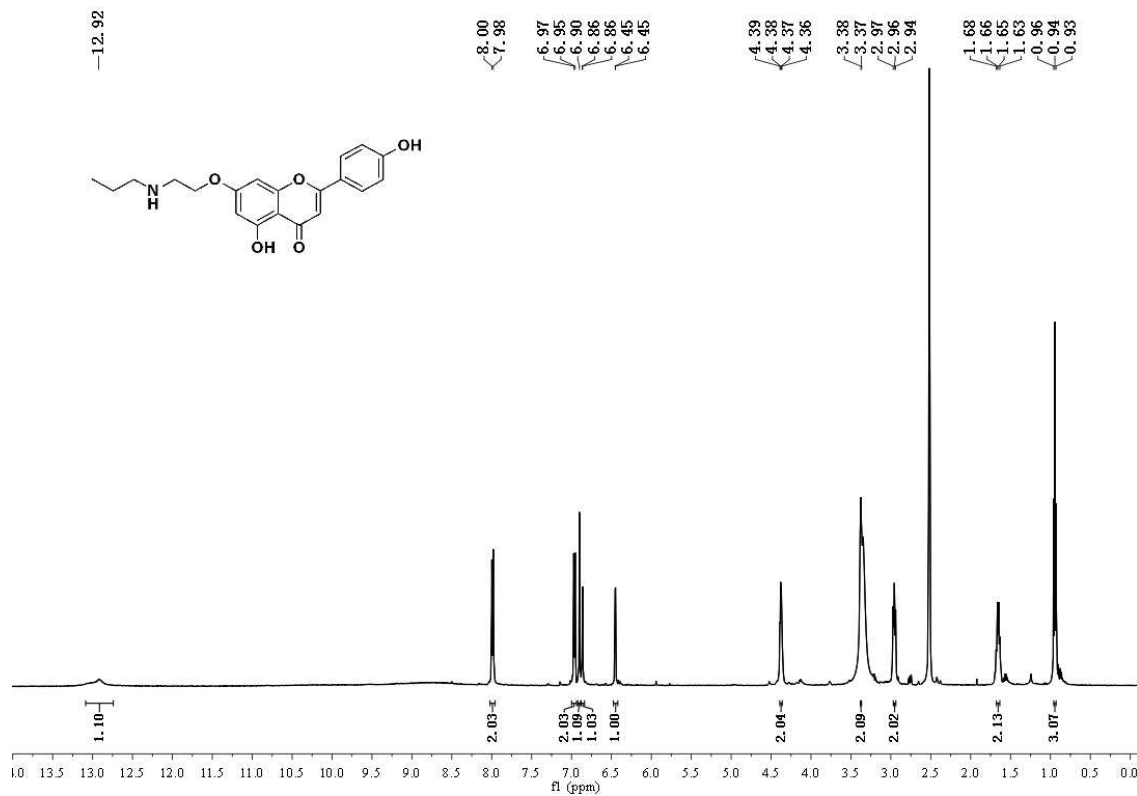

**Figure S10.**  $^{13}\text{C-NMR}$  spectrum (125 MHz,  $\text{DMSO-}d_6$ ) of 7-[2-(propylamino)ethoxy]-5-hydroxy-2-(4-hydroxyphenyl)-4H-chromen-4-one **3c**.

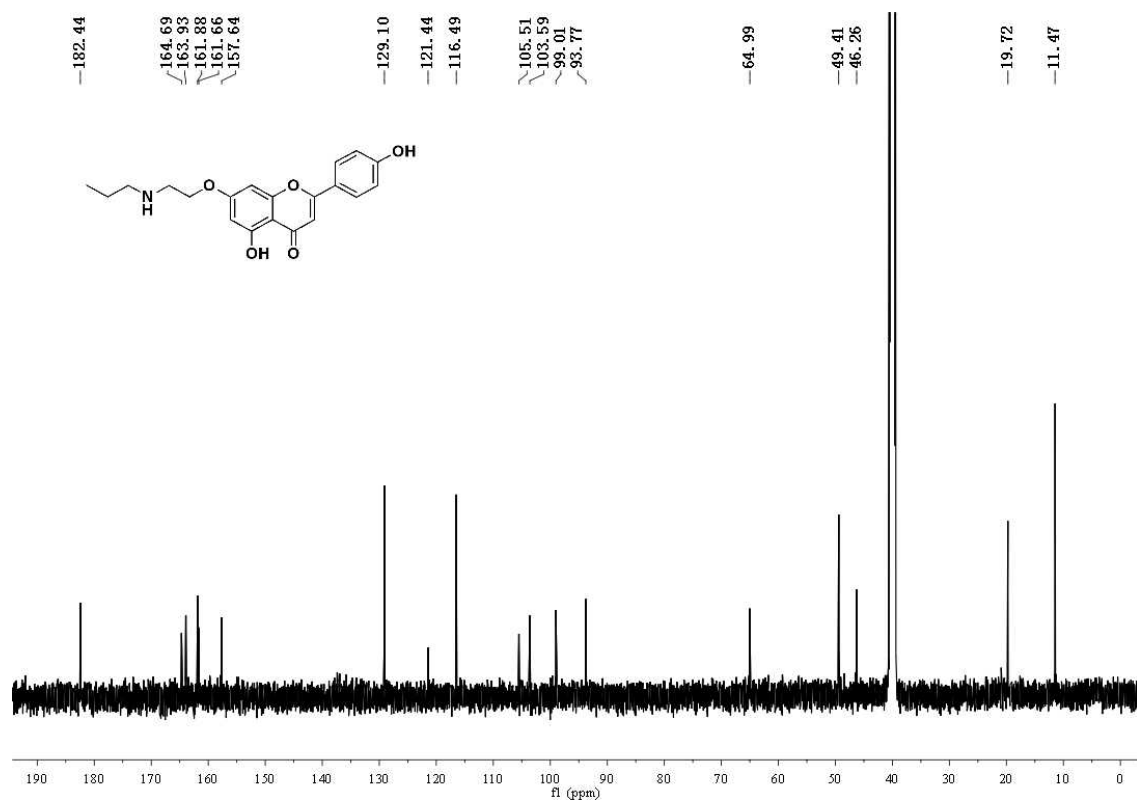

**Figure S11.**  $^1\text{H-NMR}$  spectrum (500 MHz,  $\text{DMSO-}d_6$ ) of 7-[2-(*n*-butylamino)ethoxy]-5-hydroxy-2-(4-hydroxyphenyl)-4H-chromen-4-one **3d**.

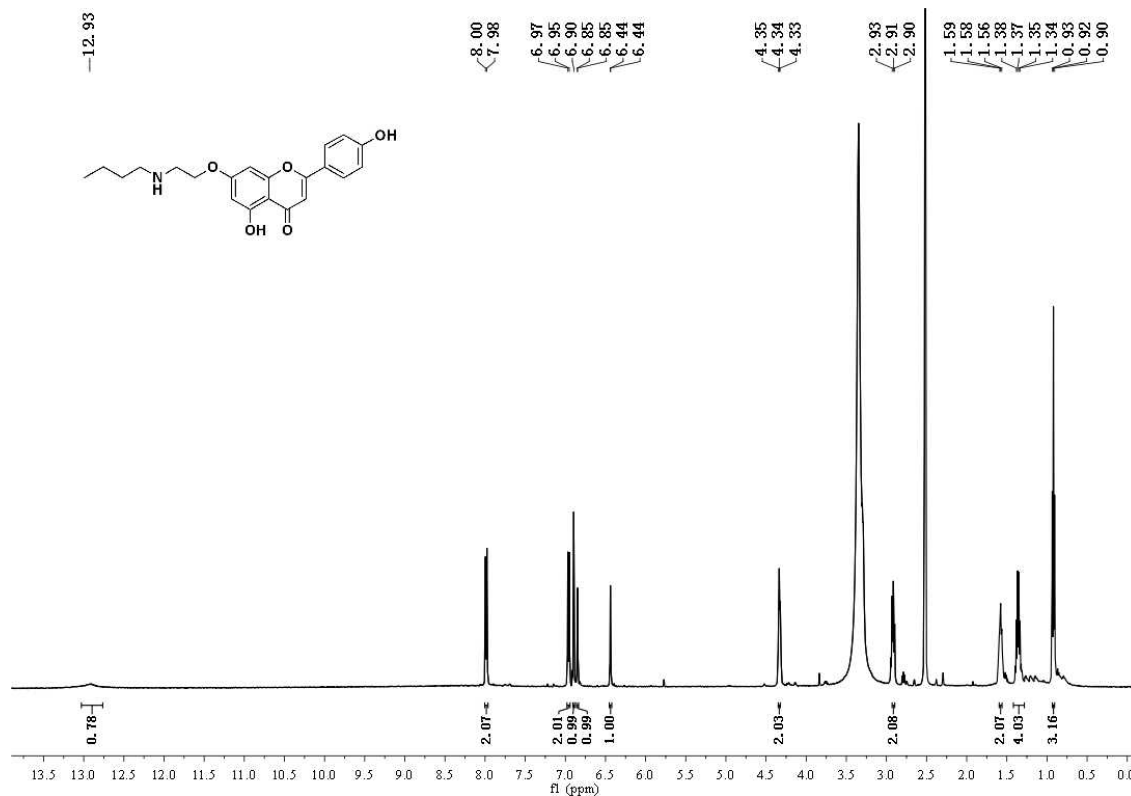

**Figure S12.**  $^{13}\text{C-NMR}$  spectrum (125 MHz,  $\text{DMSO-}d_6$ ) of 7-[2-(*n*-butylamino)ethoxy]-5-hydroxy-2-(4-hydroxyphenyl)-4H-chromen-4-one **3d**.

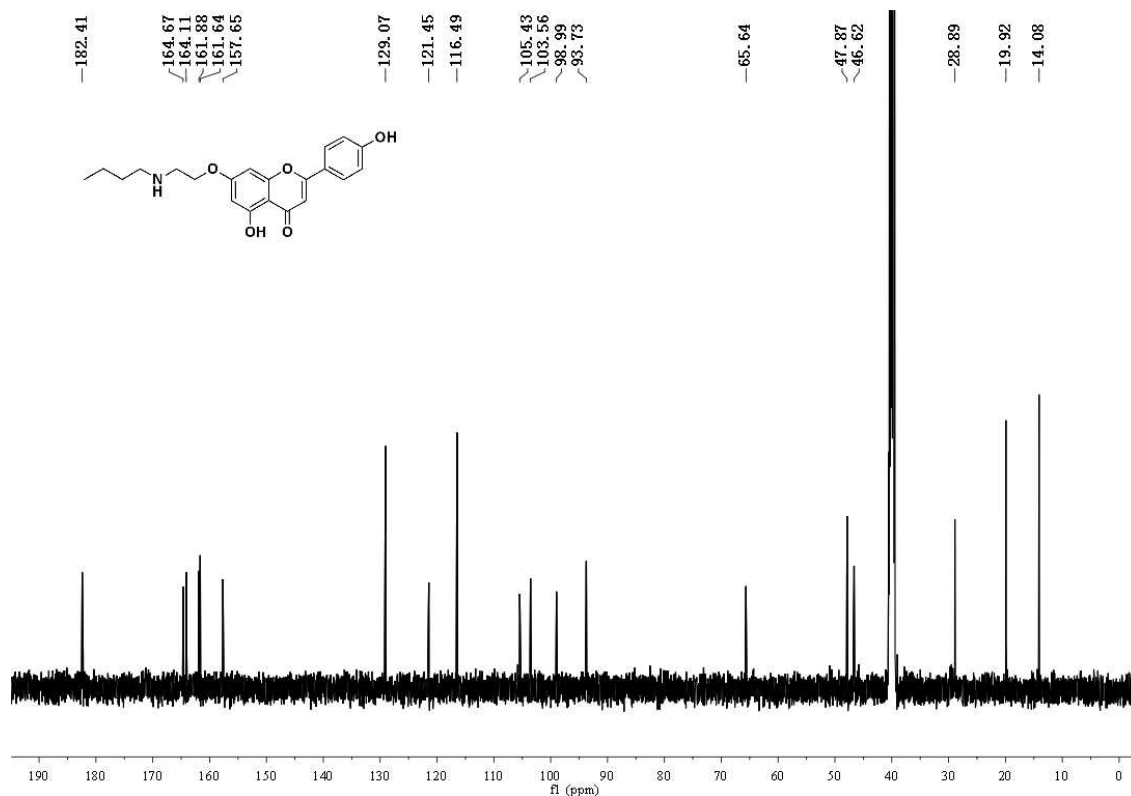

**Figure S13.**  $^1\text{H-NMR}$  spectrum (500 MHz,  $\text{DMSO-}d_6$ ) of 7-[2-(*tert*-butylamino)ethoxy]-5-hydroxy-2-(4-hydroxyphenyl)-4H-chromen-4-one **3e**.

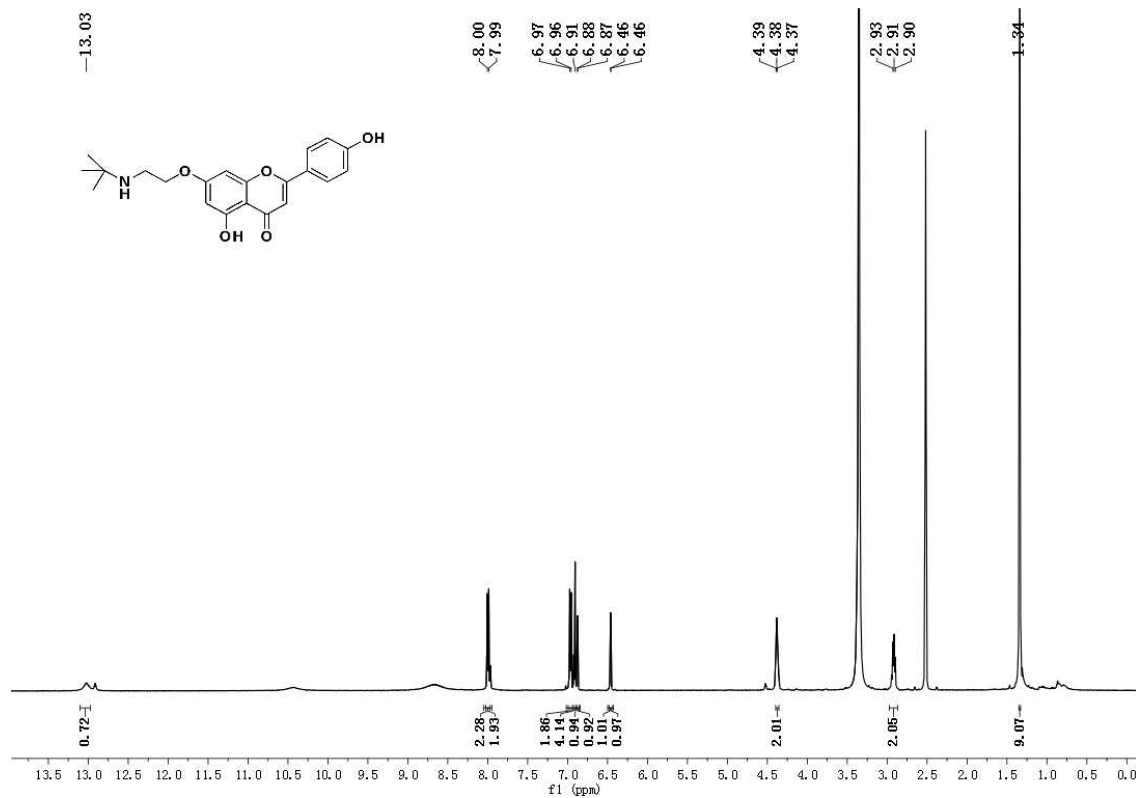

**Figure S14.**  $^{13}\text{C-NMR}$  spectrum (125 MHz,  $\text{DMSO-}d_6$ ) of 7-[2-(*tert*-butylamino)ethoxy]-5-hydroxy-2-(4-hydroxyphenyl)-4H-chromen-4-one **3e**.

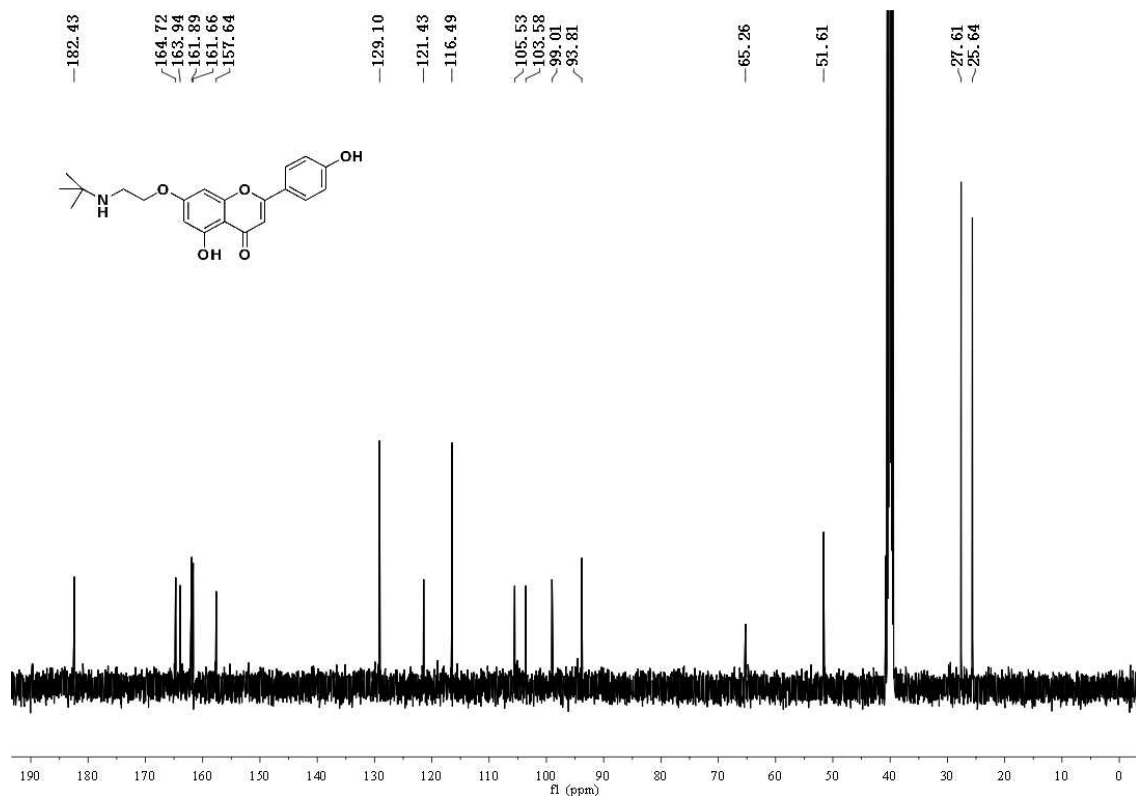

**Figure S15.**  $^1\text{H-NMR}$  spectrum (500 MHz,  $\text{DMSO-}d_6$ ) of 7-[2-(2'-hydroxyethylamino)ethoxy]-5-hydroxy-2-(4-hydroxyphenyl)-4H-chromen-4-one **3f**.

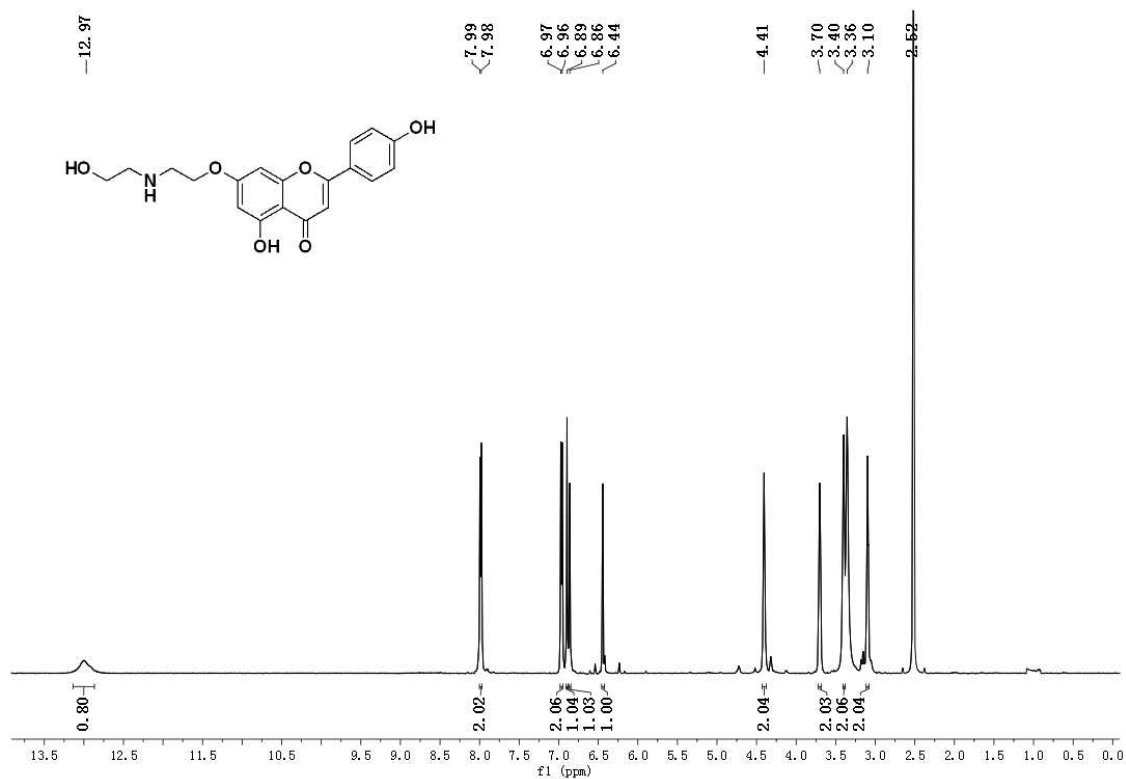

**Figure S16.**  $^{13}\text{C-NMR}$  spectrum (125 MHz,  $\text{DMSO-}d_6$ ) of 7-[2-(2'-hydroxyethylamino)ethoxy]-5-hydroxy-2-(4-hydroxyphenyl)-4H-chromen-4-one **3f**.

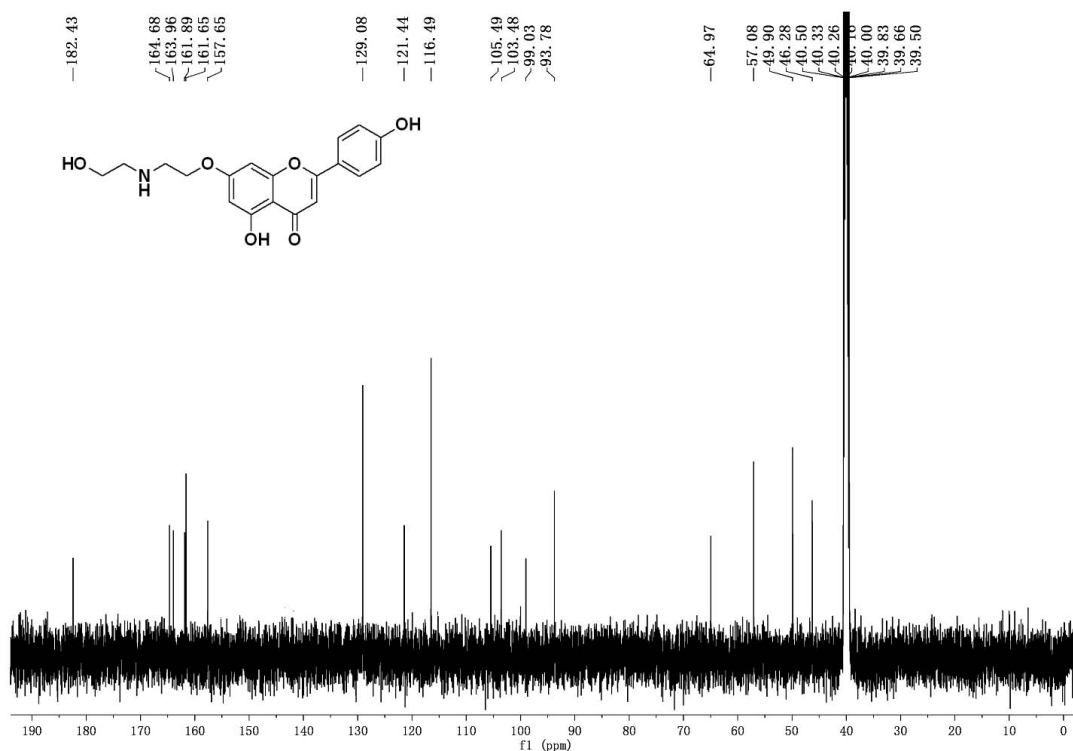



**Figure S17.**  $^1\text{H-NMR}$  spectrum (500 MHz,  $\text{DMSO-}d_6$ ) of 7-[2-(cyclohexylamino)ethoxy]-5-hydroxy-2-(4-hydroxyphenyl)-4H-chromen-4-one **3g**.

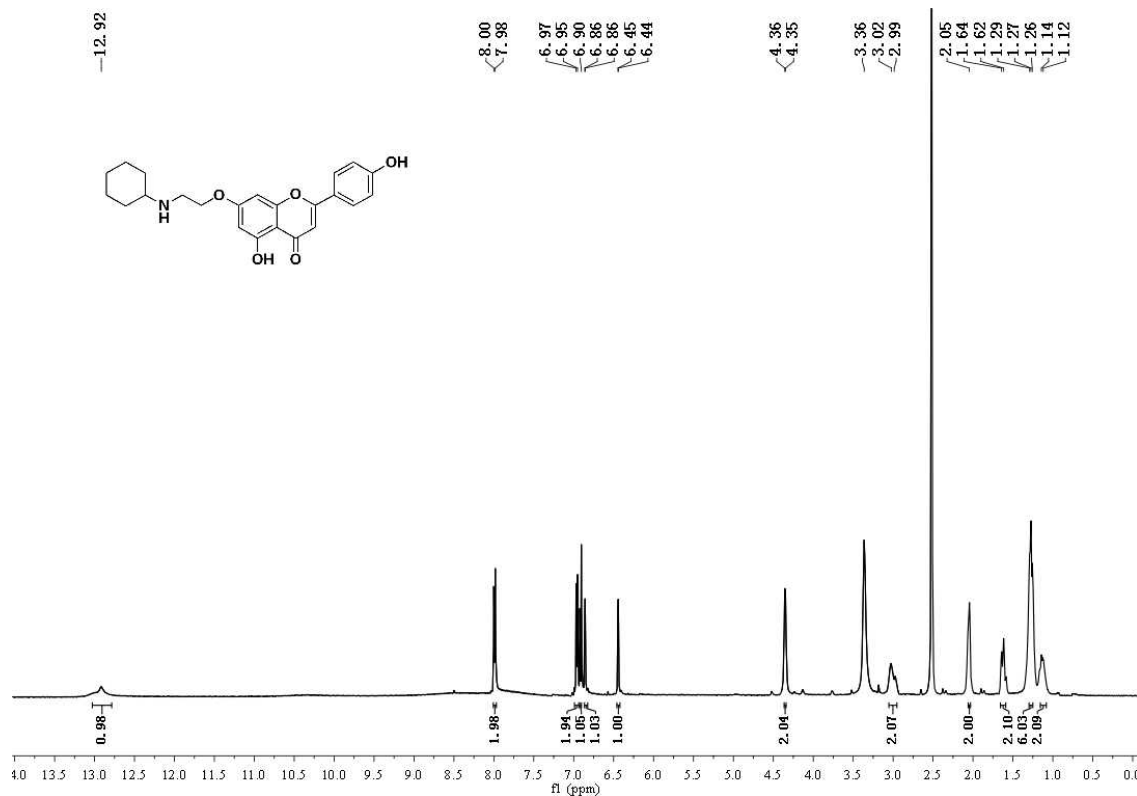

**Figure S18.**  $^{13}\text{C-NMR}$  spectrum (125 MHz,  $\text{DMSO-}d_6$ ) of 7-[2-(cyclohexylamino)ethoxy]-5-hydroxy-2-(4-hydroxyphenyl)-4H-chromen-4-one **3g**.

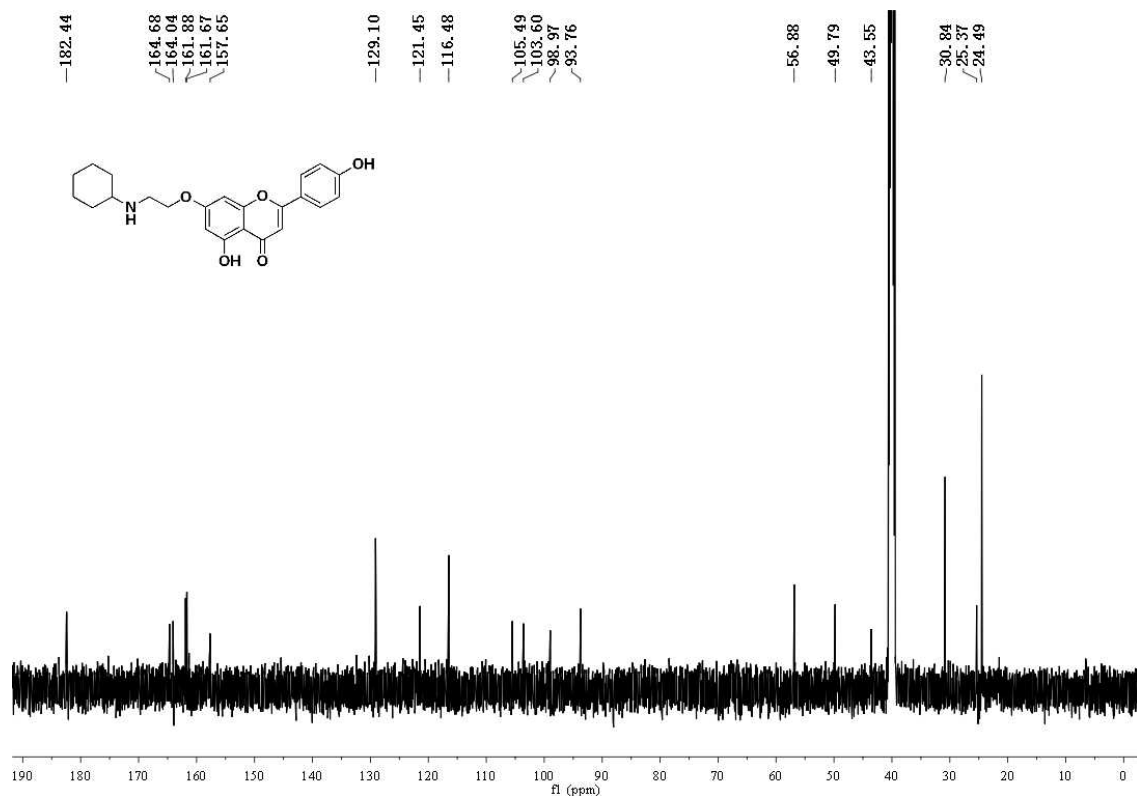

**Figure S19.**  $^1\text{H-NMR}$  spectrum (500 MHz,  $\text{DMSO-}d_6$ ) of 7-[2-(pyrrolidin-1-yl)ethoxy]-5-hydroxy-2-(4-hydroxyphenyl)-4H-chromen-4-one **3h**.

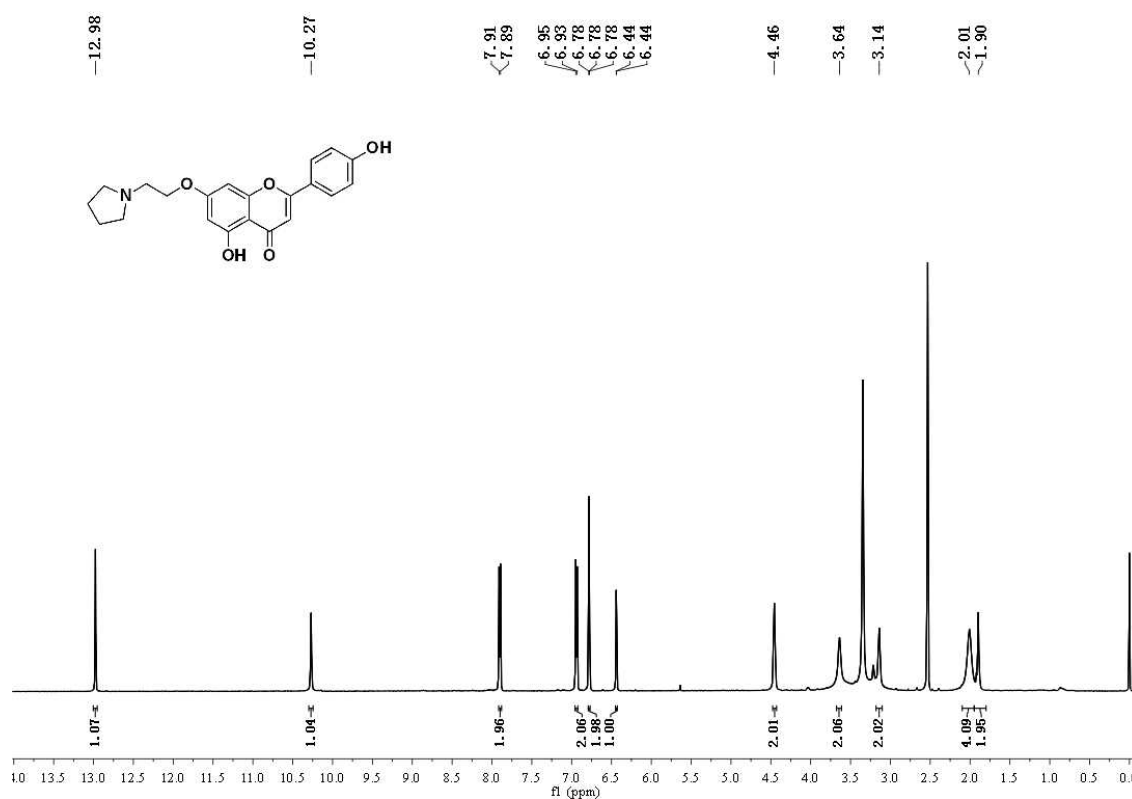

**Figure S20.**  $^{13}\text{C-NMR}$  spectrum (125 MHz,  $\text{DMSO-}d_6$ ) of 7-[2-(pyrrolidin-1-yl)ethoxy]-5-hydroxy-2-(4-hydroxyphenyl)-4H-chromen-4-one **3h**.

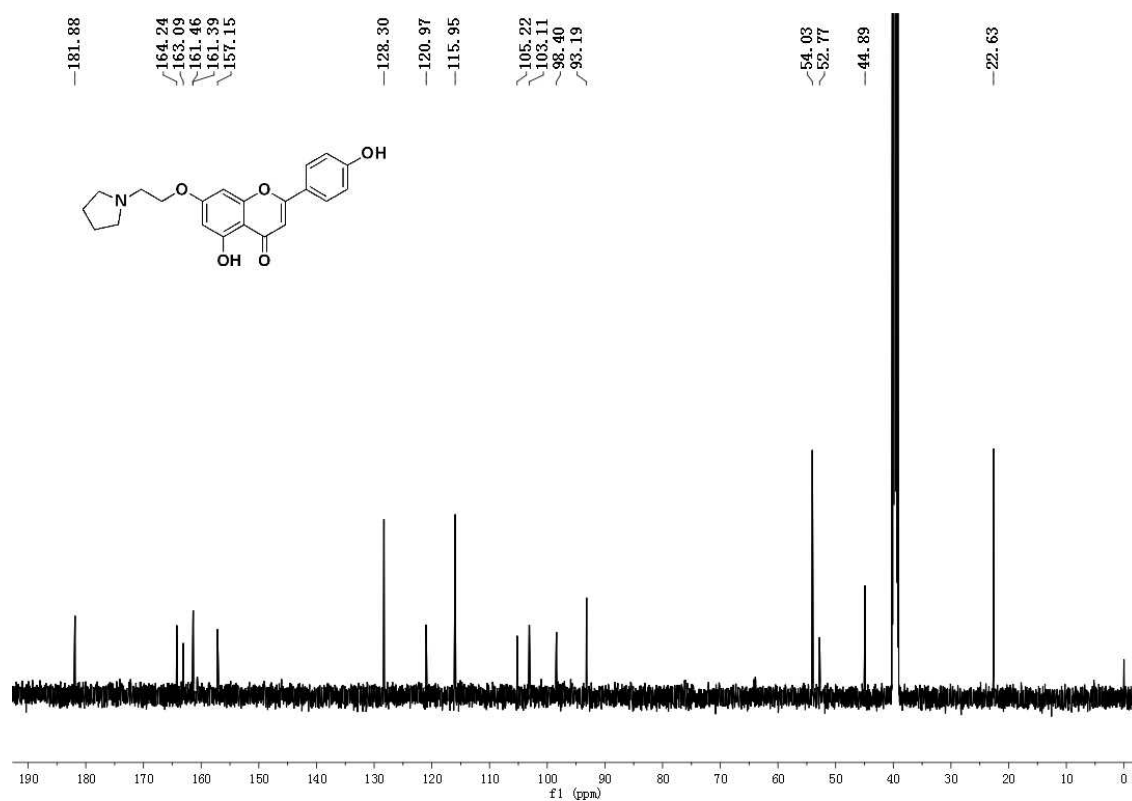

**Figure S21.**  $^1\text{H-NMR}$  spectrum (500 MHz,  $\text{DMSO-}d_6$ ) of 7-[2-(morpholin-4-yl)ethoxy]-5-hydroxy-2-(4-hydroxyphenyl)-4H-chromen-4-one **3i**.

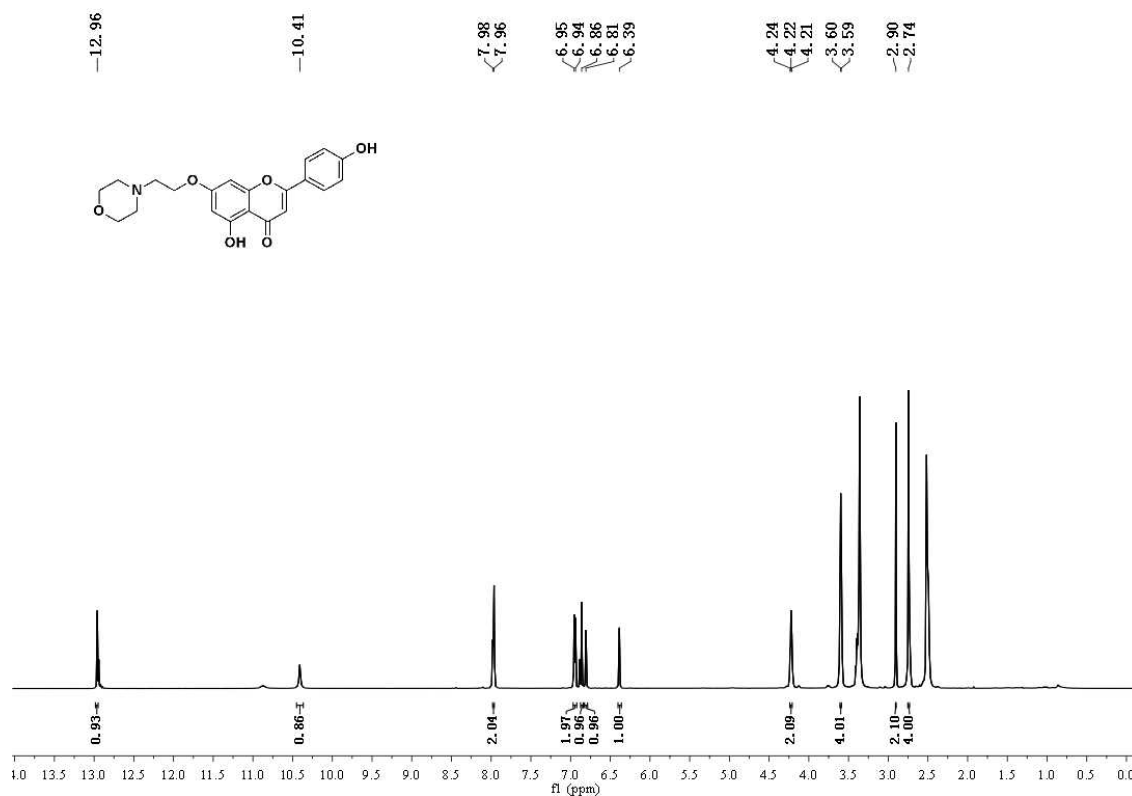

**Figure S22.**  $^{13}\text{C-NMR}$  spectrum (125 MHz,  $\text{DMSO-}d_6$ ) of 7-[2-(morpholin-4-yl)ethoxy]-5-hydroxy-2-(4-hydroxyphenyl)-4H-chromen-4-one **3i**.

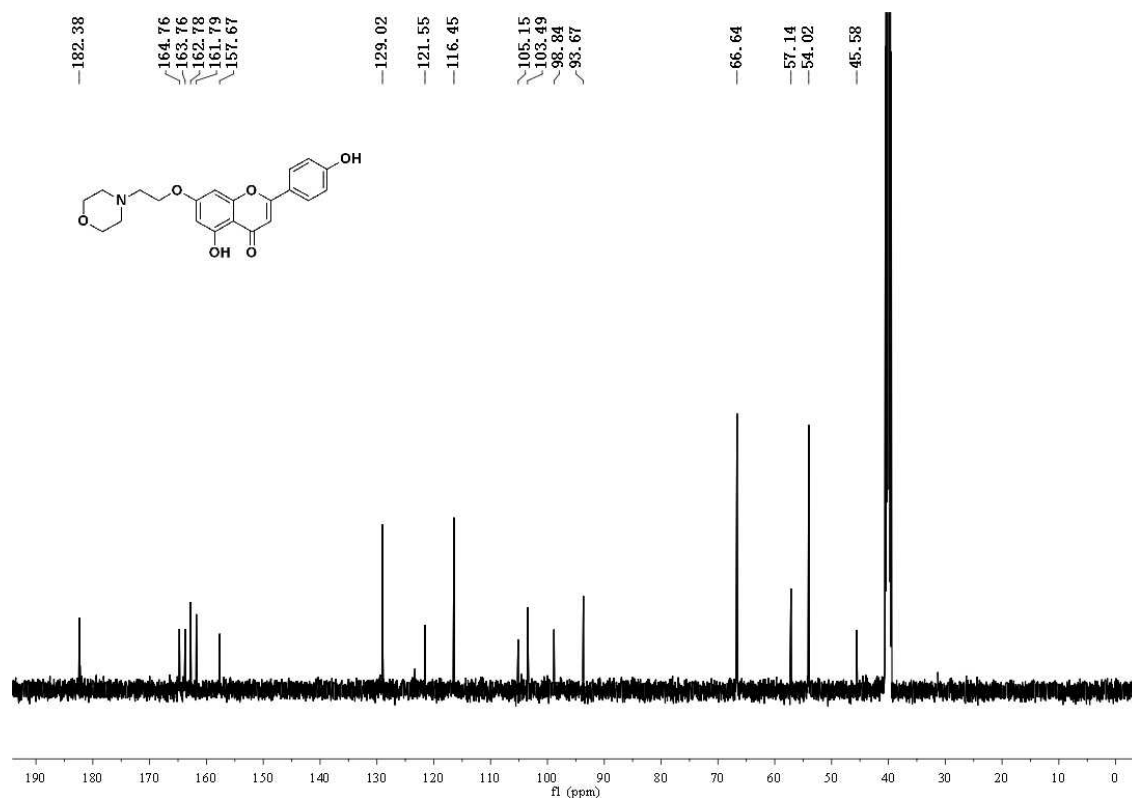

**Figure S23.**  $^1\text{H-NMR}$  spectrum (500 MHz,  $\text{DMSO-}d_6$ ) of 7-[2-(piperazin-1-yl)ethoxy]-5-hydroxy-2-(4-hydroxyphenyl)-4H-chromen-4-one **3j**.

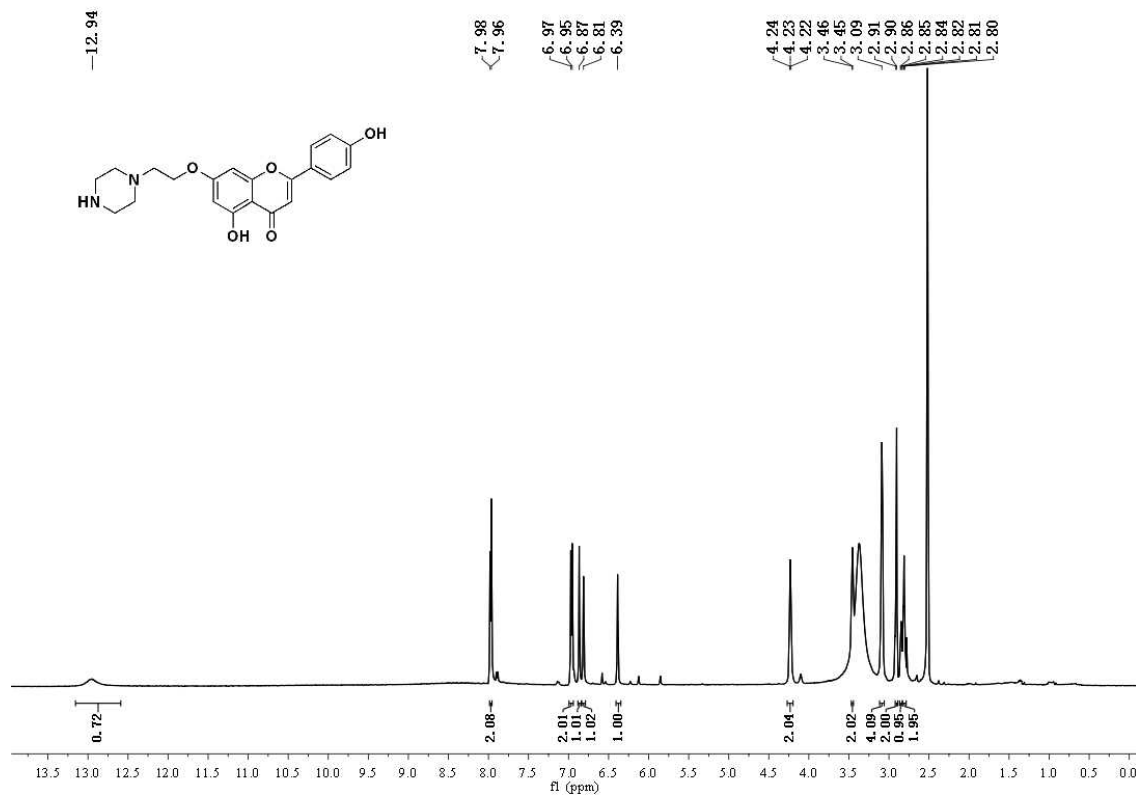

**Figure S24.**  $^{13}\text{C-NMR}$  spectrum (125 MHz,  $\text{DMSO-}d_6$ ) of 7-[2-(piperazin-1-yl)ethoxy]-5-hydroxy-2-(4-hydroxyphenyl)-4H-chromen-4-one **3j**.

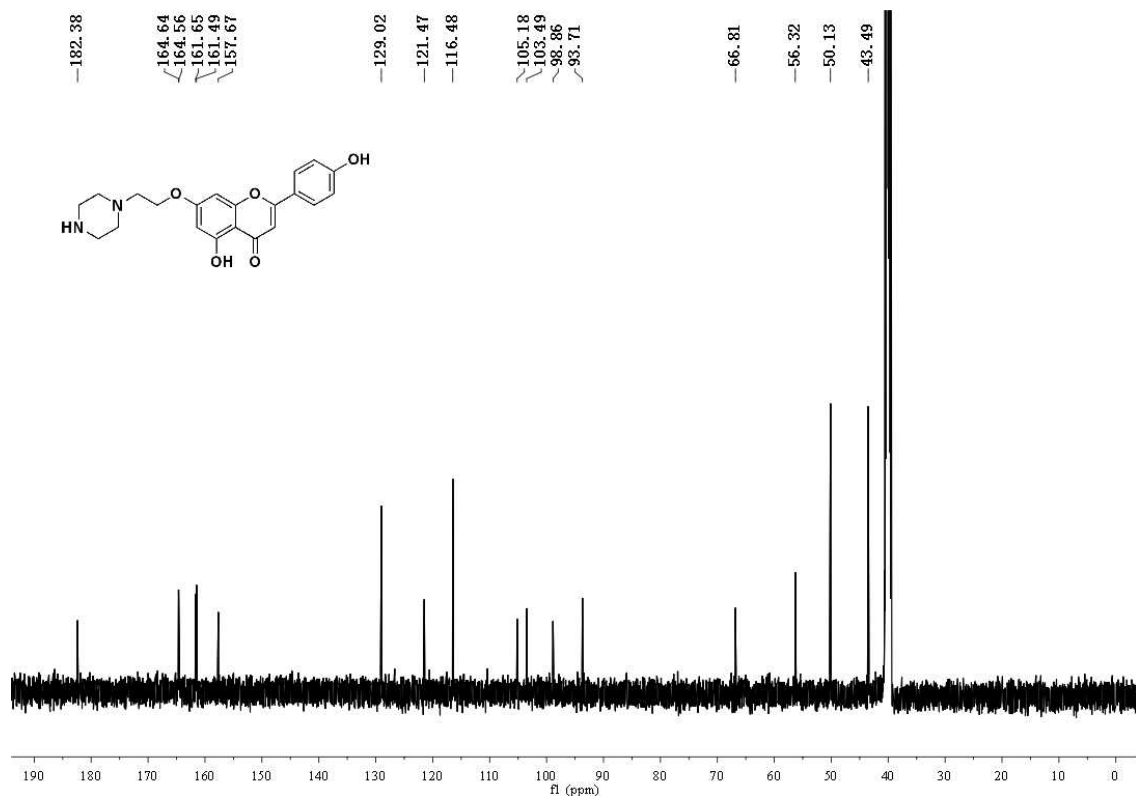

**Figure S25.**  $^1\text{H-NMR}$  spectrum (500 MHz,  $\text{DMSO-}d_6$ ) of 7-[3-(ethylamino)propoxy]-5-hydroxy-2-(4-hydroxyphenyl)-4H-chromen-4-one **4a**.

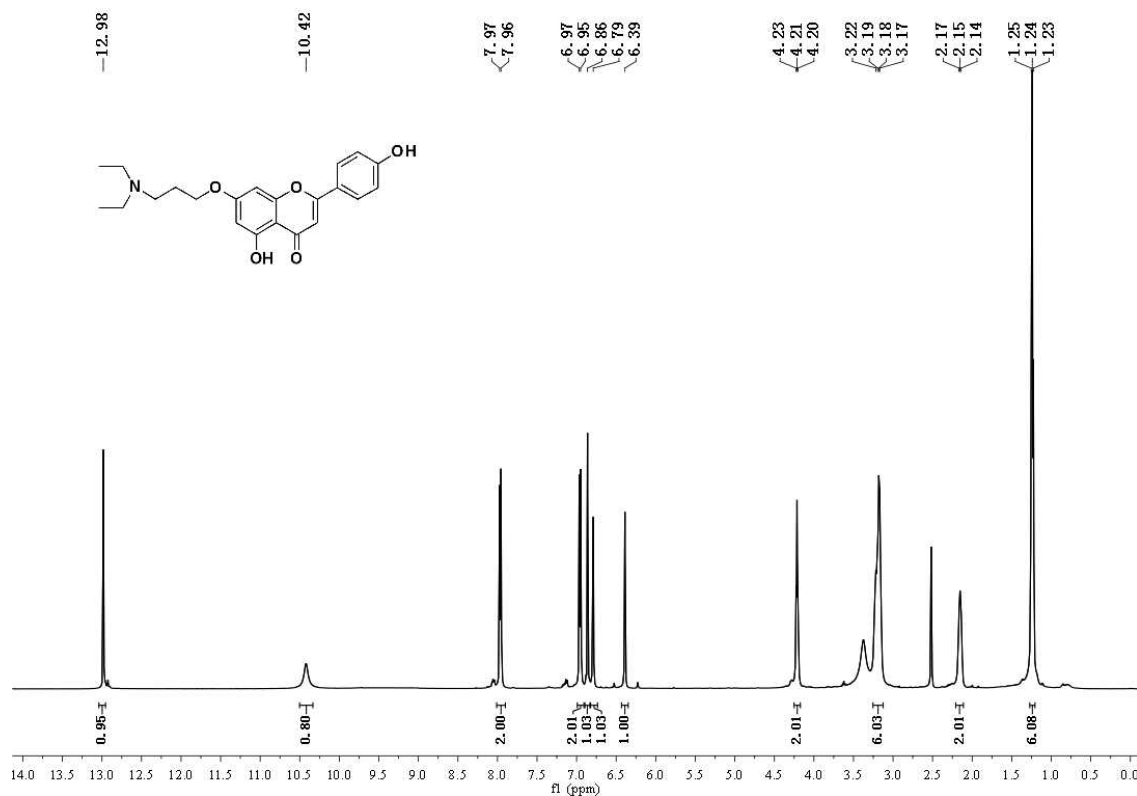

**Figure S26.**  $^{13}\text{C-NMR}$  spectrum (125 MHz,  $\text{DMSO-}d_6$ ) of 7-[3-(diethylamino)propoxy]-5-hydroxy-2-(4-hydroxyphenyl)-4H-chromen-4-one **4a**.

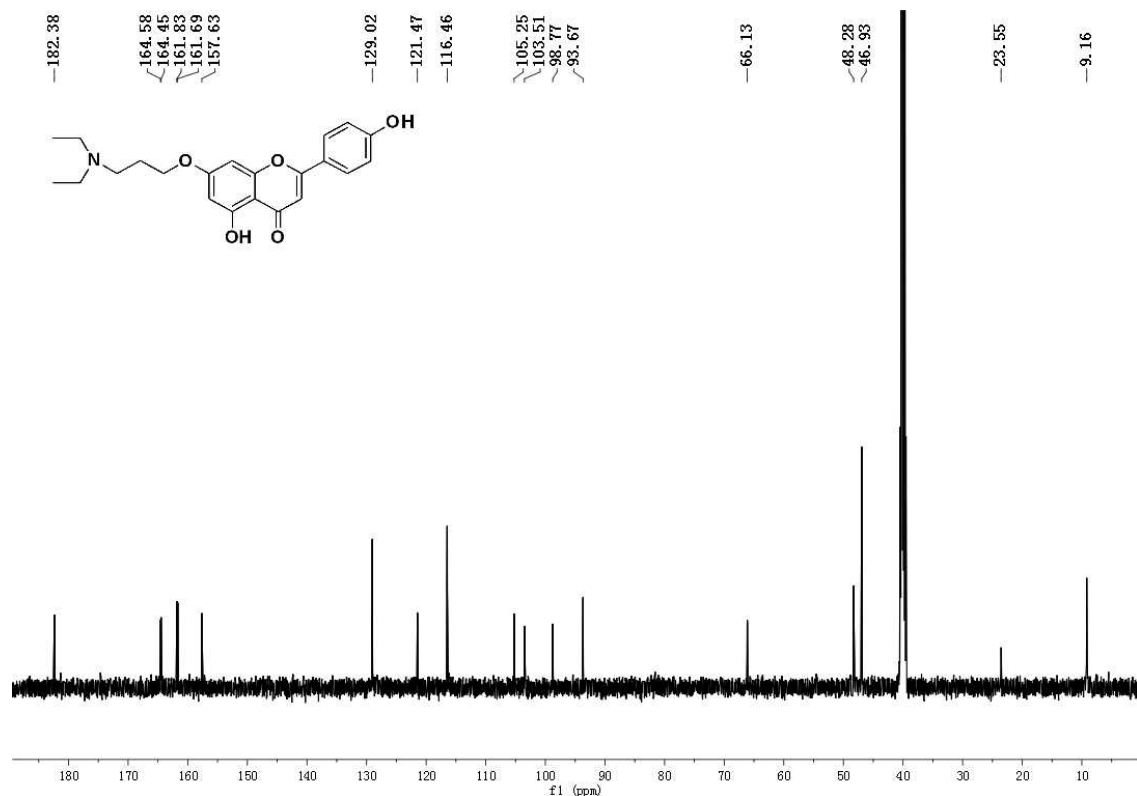

**Figure S27.**  $^1\text{H-NMR}$  spectrum (400 MHz,  $\text{DMSO-}d_6$ ) of 7-[3-(ethylamino)propoxy]-5-hydroxy-2-(4-hydroxyphenyl)-4H-chromen-4-one **4b**.

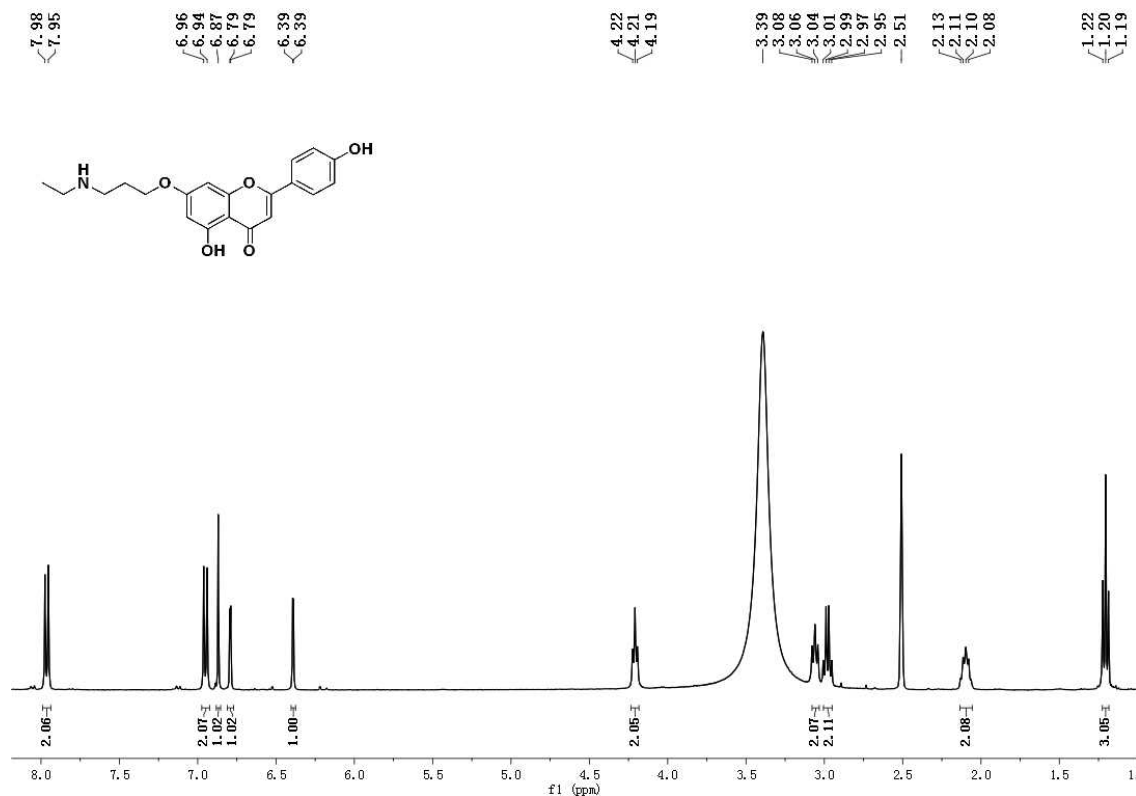

**Figure S28.**  $^{13}\text{C-NMR}$  spectrum (100 MHz,  $\text{DMSO-}d_6$ ) of 7-[3-(ethylamino)propoxy]-5-hydroxy-2-(4-hydroxyphenyl)-4H-chromen-4-one **4b**.

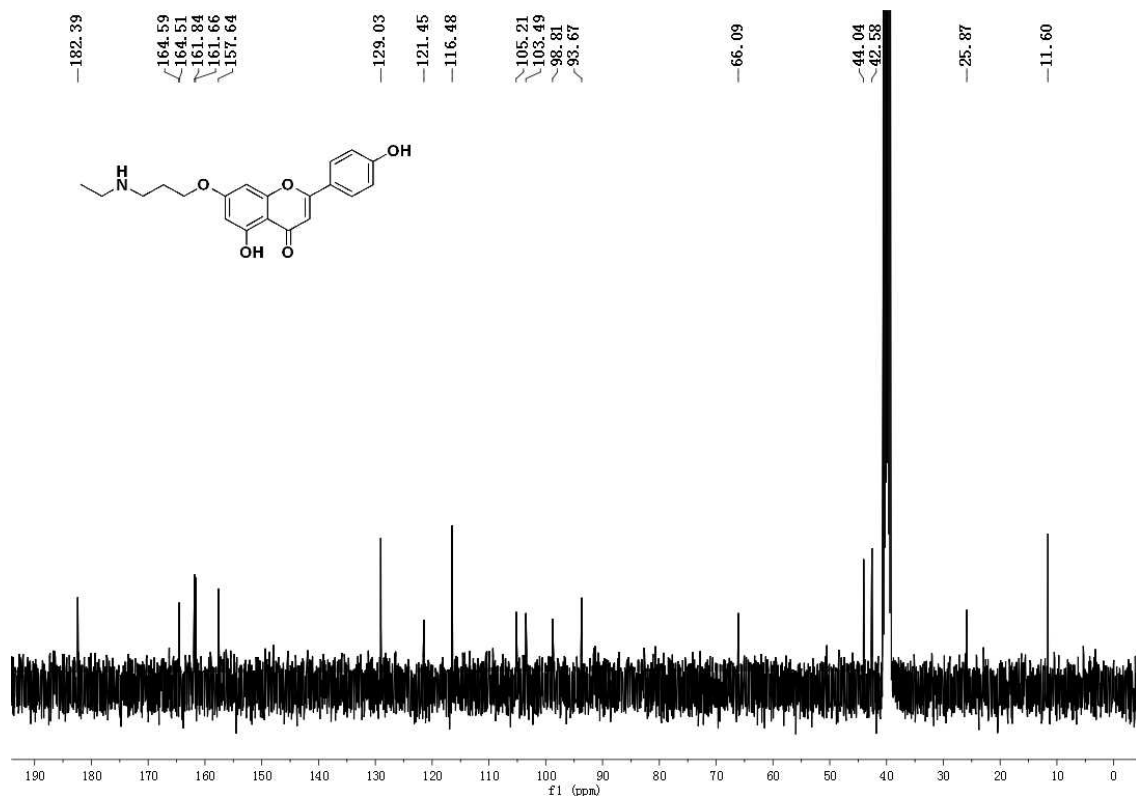

**Figure S29.**  $^1\text{H-NMR}$  spectrum (400 MHz,  $\text{DMSO-}d_6$ ) of 7-[3-(propylamino)propoxy]-5-hydroxy-2-(4-hydroxyphenyl)-4H-chromen-4-one **4c**.

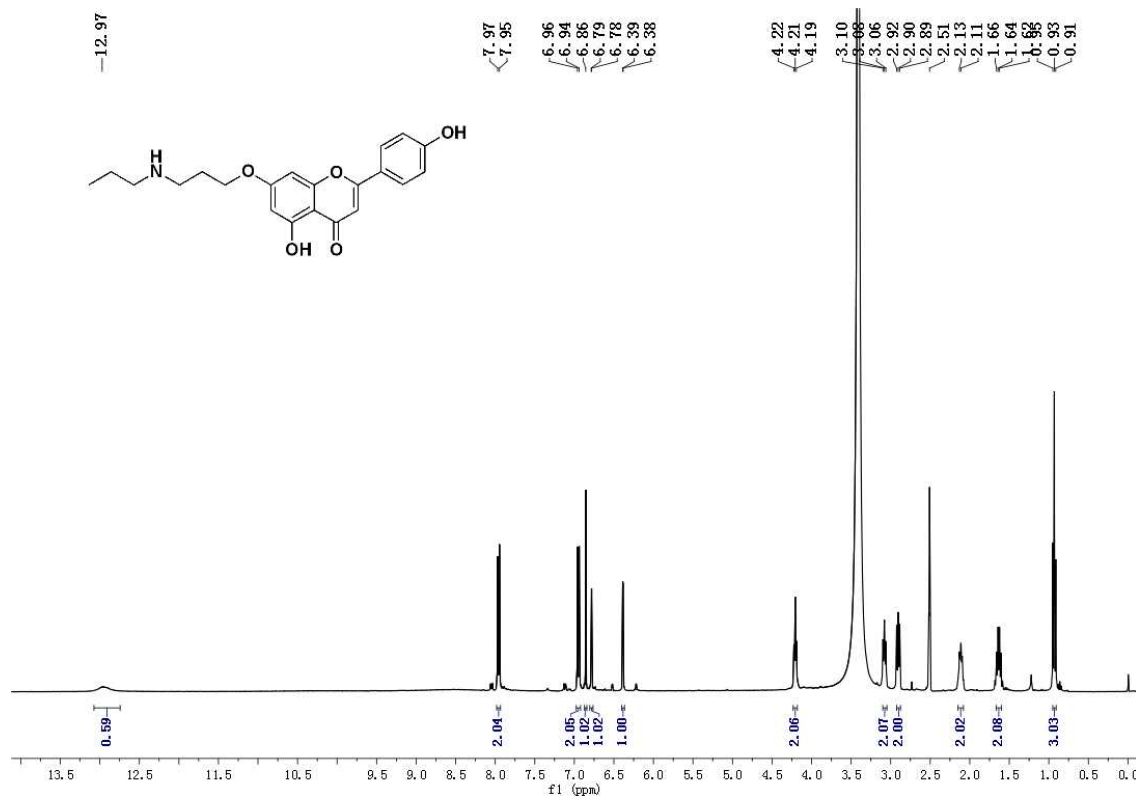

**Figure S30.**  $^{13}\text{C-NMR}$  spectrum (100 MHz,  $\text{DMSO-}d_6$ ) of 7-[3-(propylamino)propoxy]-5-hydroxy-2-(4-hydroxyphenyl)-4H-chromen-4-one **4c**.

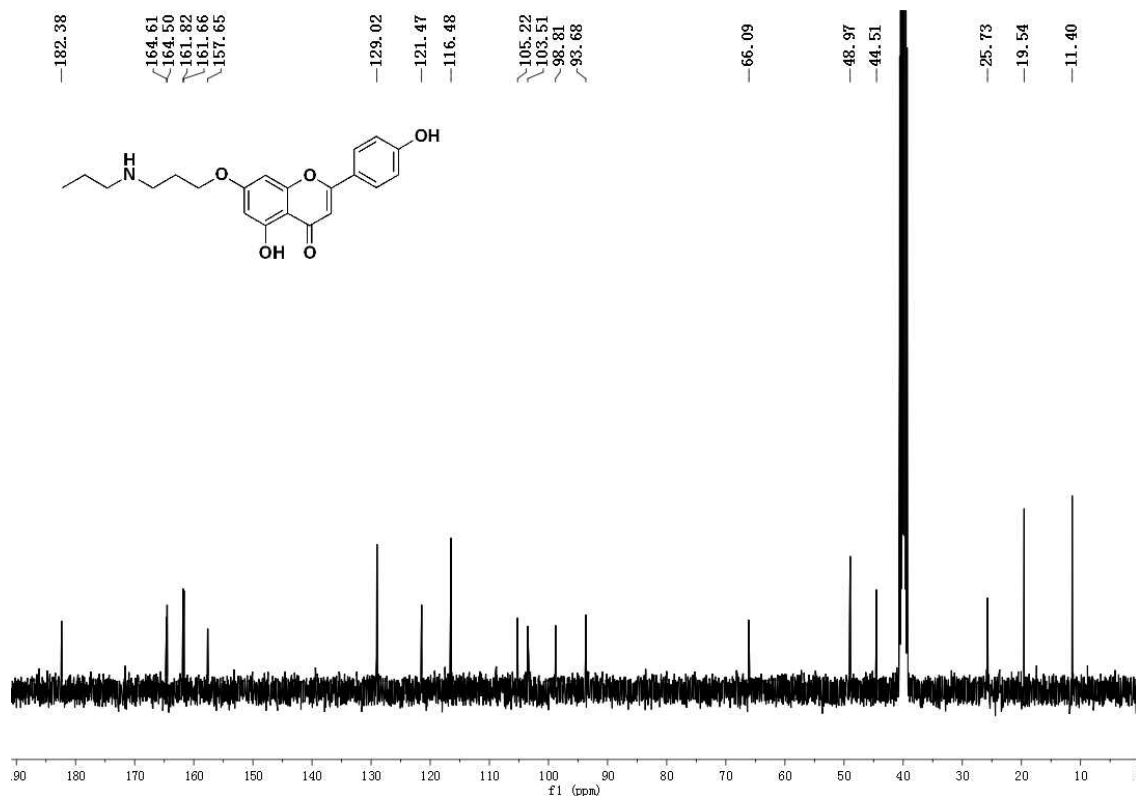

**Figure S31.**  $^1\text{H-NMR}$  spectrum (400 MHz,  $\text{DMSO-}d_6$ ) of 7-[3-(*n*-butylamino)propoxy]-5-hydroxy-2-(4-hydroxyphenyl)-4H-chromen-4-one **4d**.

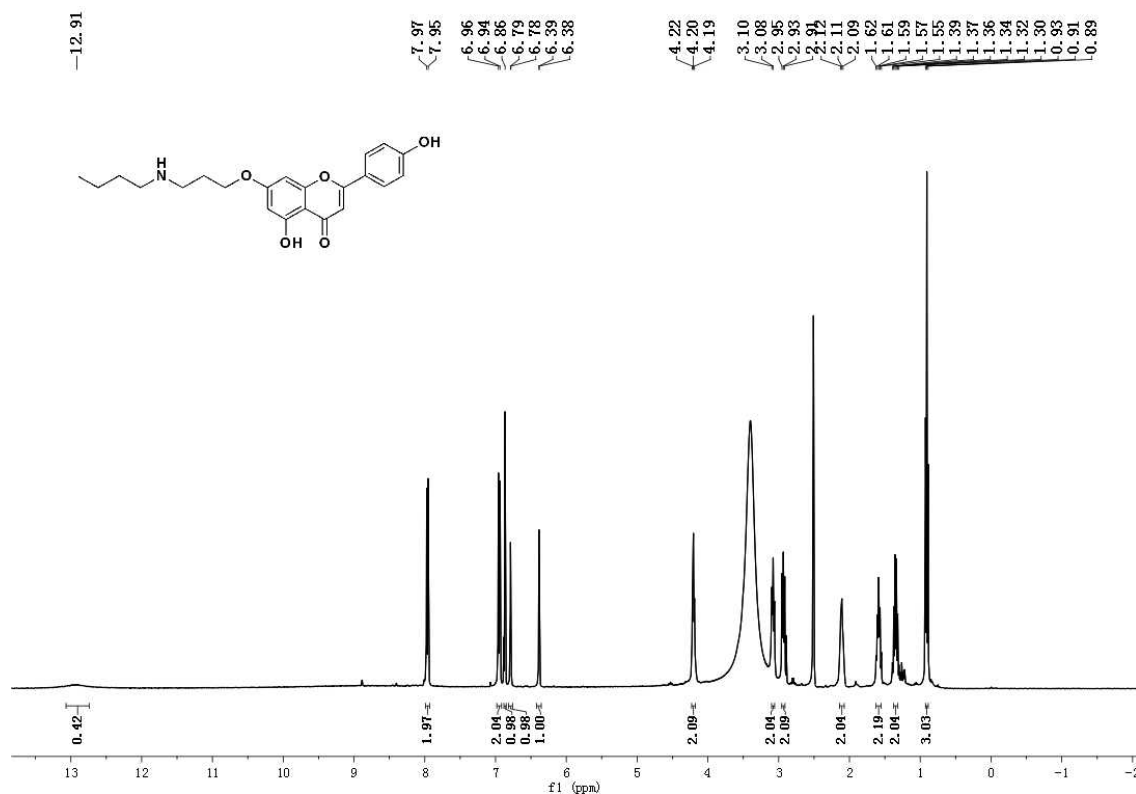

**Figure S32.**  $^{13}\text{C-NMR}$  spectrum (100 MHz,  $\text{DMSO-}d_6$ ) of 7-[3-(*n*-butylamino)propoxy]-5-hydroxy-2-(4-hydroxyphenyl)-4H-chromen-4-one **4d**.

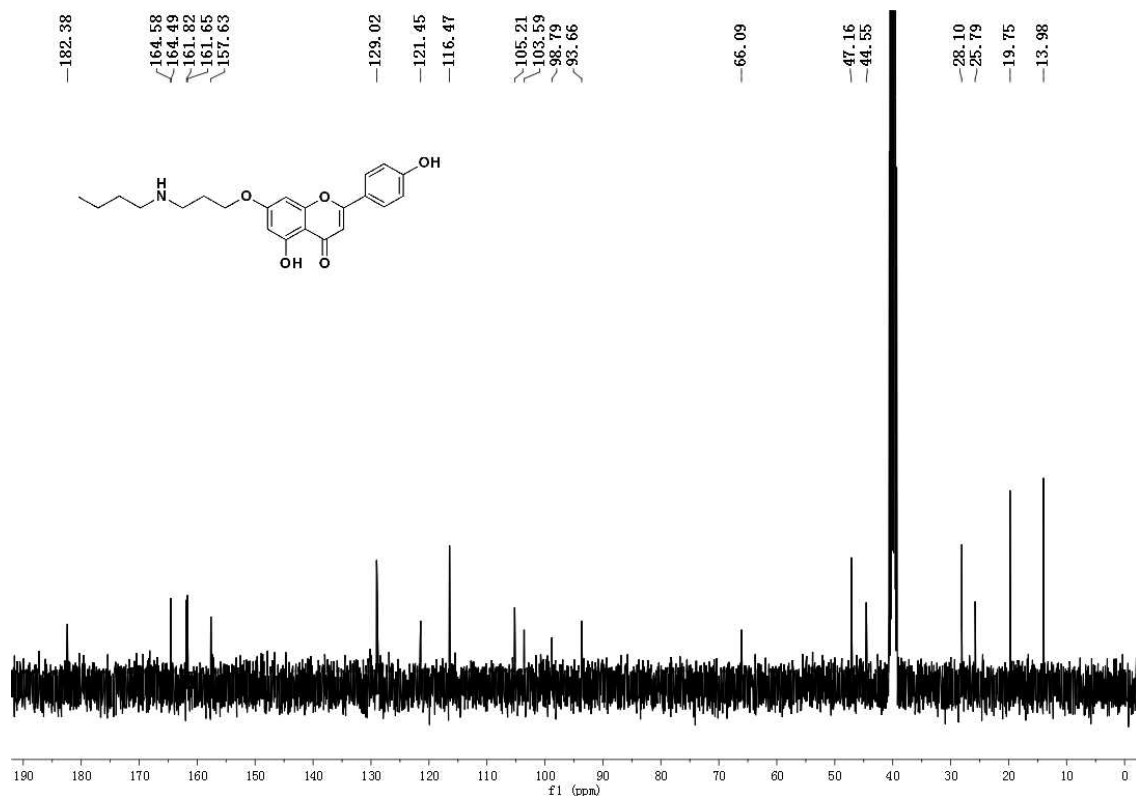



**Figure S33.**  $^1\text{H-NMR}$  spectrum (400 MHz,  $\text{DMSO-}d_6$ ) of 7-[3-(*tert*-butylamino) propoxy]-5-hydroxy-2-(4-hydroxyphenyl)-4H-chromen-4-one **4e**.

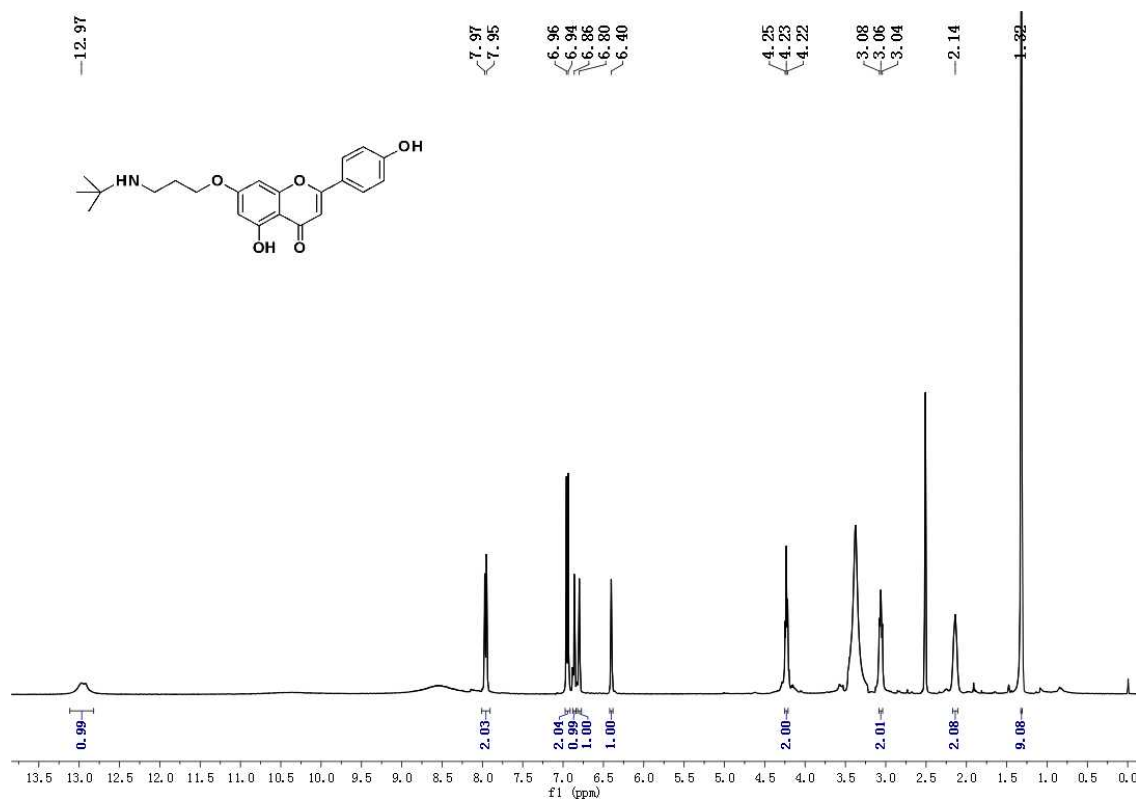

**Figure S34.**  $^{13}\text{C-NMR}$  spectrum (100 MHz,  $\text{DMSO-}d_6$ ) of 7-[3-(*tert*-butylamino) propoxy]-5-hydroxy-2-(4-hydroxyphenyl)-4H-chromen-4-one **4e**.

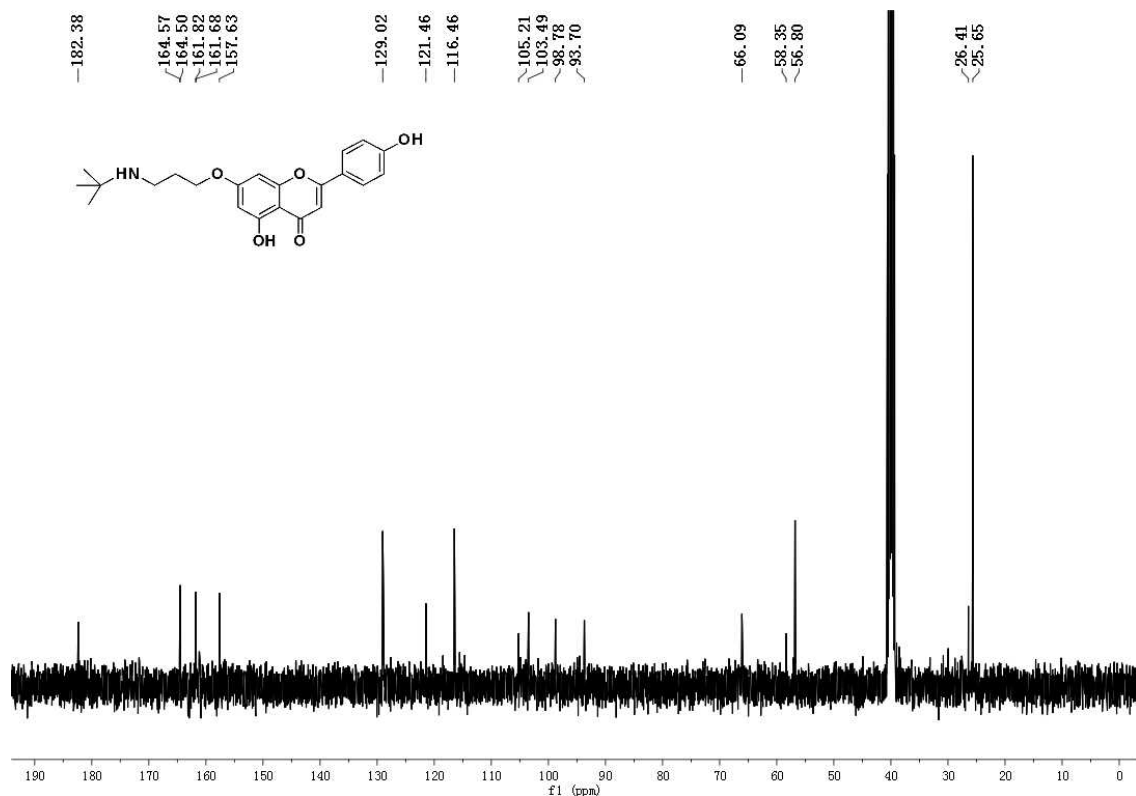

**Figure S35.**  $^1\text{H-NMR}$  spectrum (400 MHz,  $\text{DMSO-}d_6$ ) of 7-[3-(2'-hydroxyethylamino)propoxy]-5-hydroxy-2-(4-hydroxyphenyl)-4H-chromen-4-one **4f**.

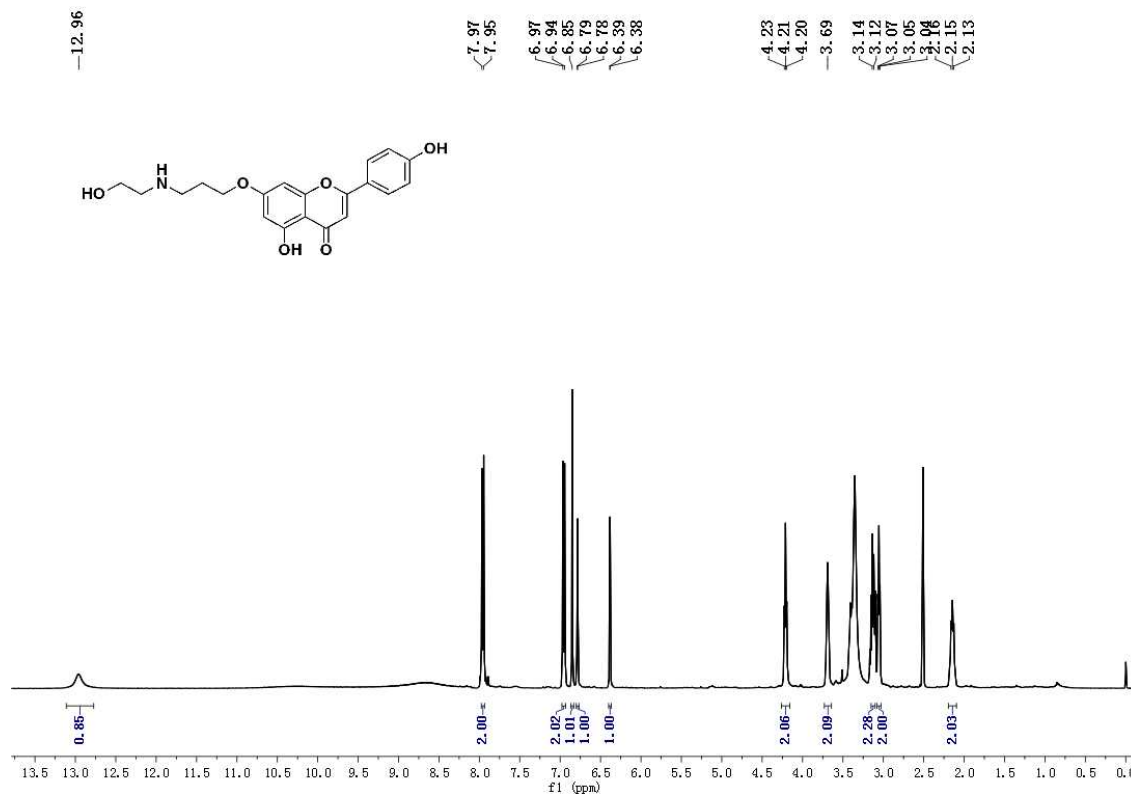

**Figure S36.**  $^{13}\text{C-NMR}$  spectrum (100 MHz,  $\text{DMSO-}d_6$ ) of 7-[3-(2'-hydroxyethylamino)propoxy]-5-hydroxy-2-(4-hydroxyphenyl)-4H-chromen-4-one **4f**.

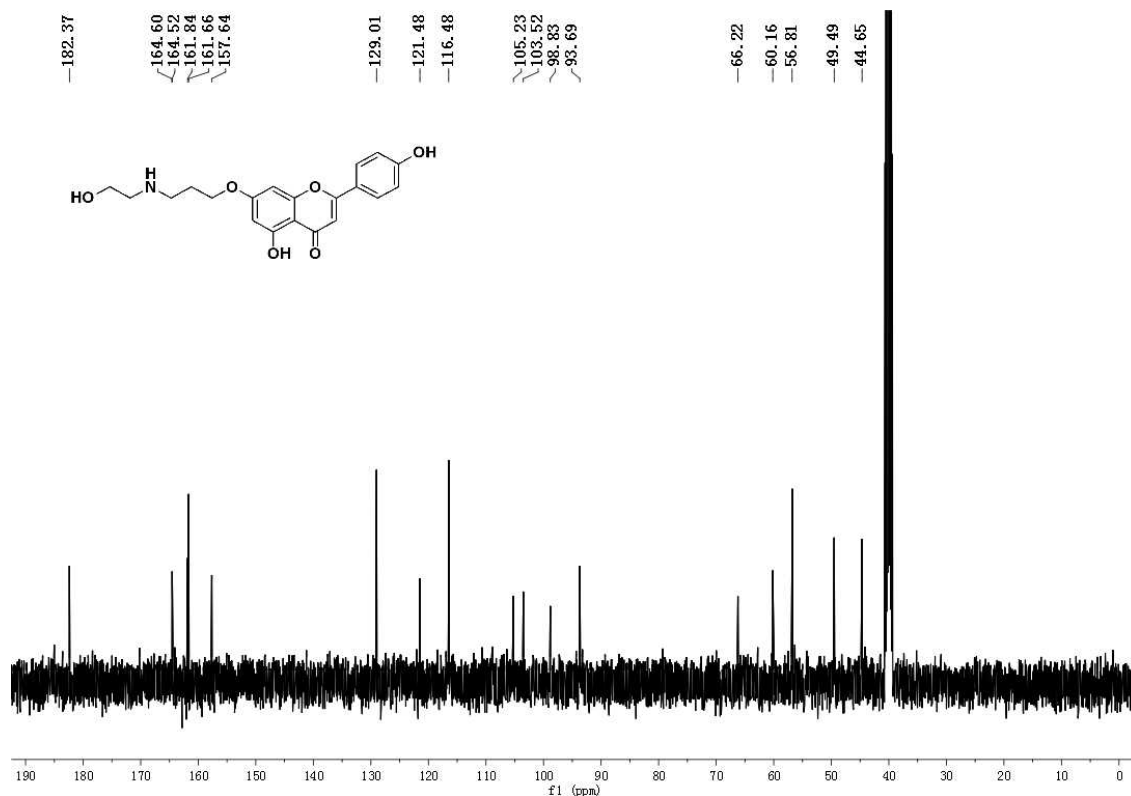

**Figure S37.**  $^1\text{H-NMR}$  spectrum (400 MHz,  $\text{DMSO-}d_6$ ) of 7-[3-(cyclohexylamino)propoxy]-5-hydroxy-2-(4-hydroxyphenyl)-4H-chromen-4-one **4g**.

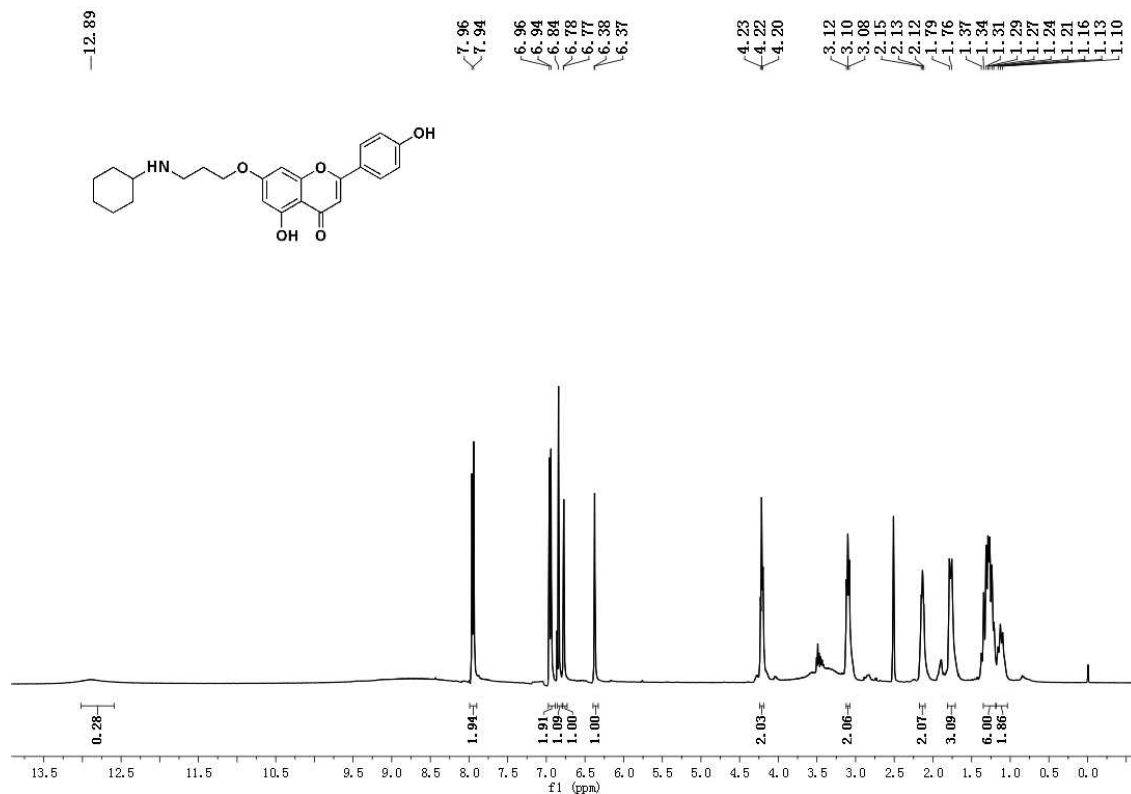

**Figure S38.**  $^{13}\text{C-NMR}$  spectrum (100 MHz,  $\text{DMSO-}d_6$ ) of 7-[3-(cyclohexylamino)propoxy]-5-hydroxy-2-(4-hydroxyphenyl)-4H-chromen-4-one **4g**.

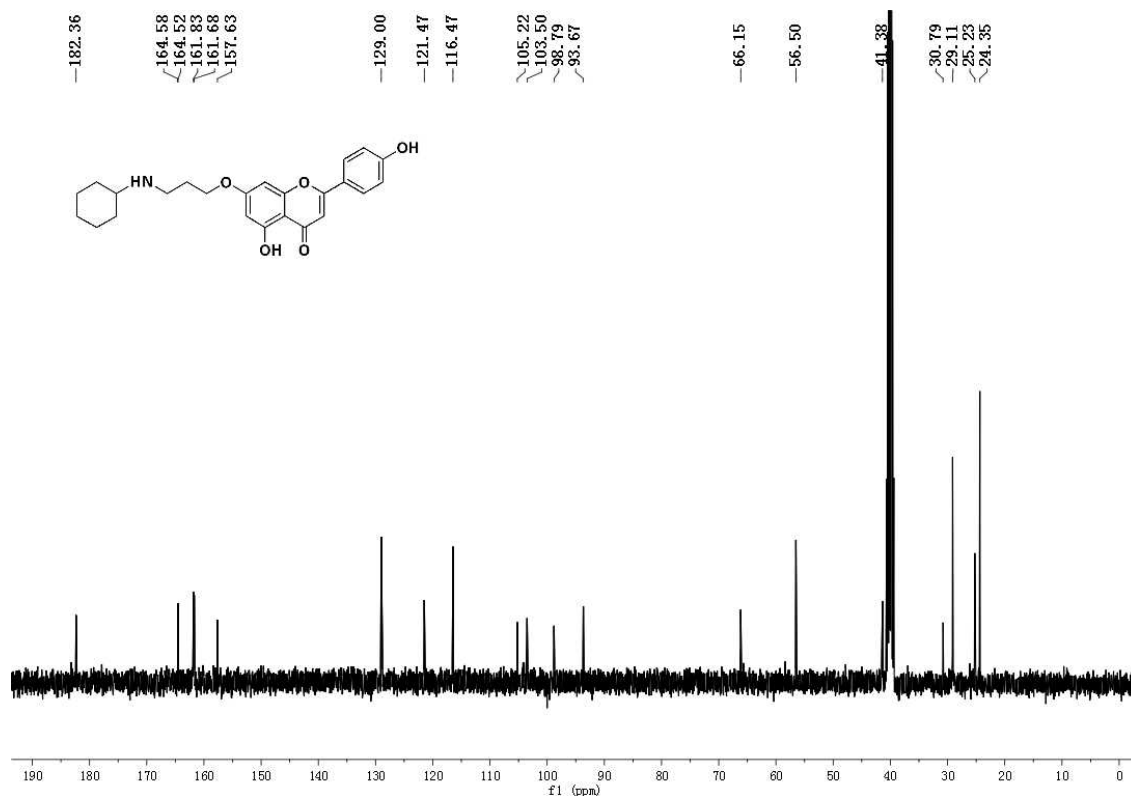

**Figure S39.**  $^1\text{H-NMR}$  spectrum (400 MHz,  $\text{DMSO-}d_6$ ) of 7-[3-(pyrrolidin-1-yl)propoxy]-5-hydroxy-2-(4-hydroxyphenyl)-4H-chromen-4-one **4h**.

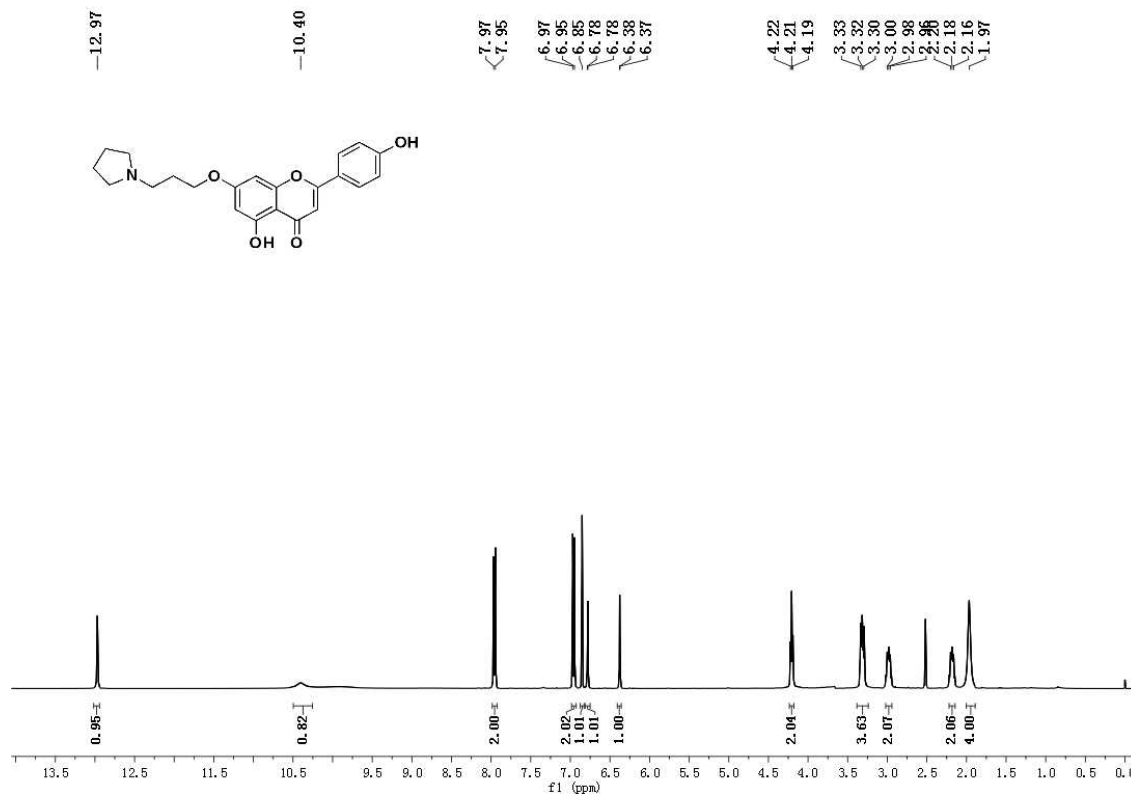

**Figure S40.**  $^{13}\text{C-NMR}$  spectrum (100 MHz,  $\text{DMSO-}d_6$ ) of 7-[3-(pyrrolidin-1-yl)propoxy]-5-hydroxy-2-(4-hydroxyphenyl)-4H-chromen-4-one **4h**.

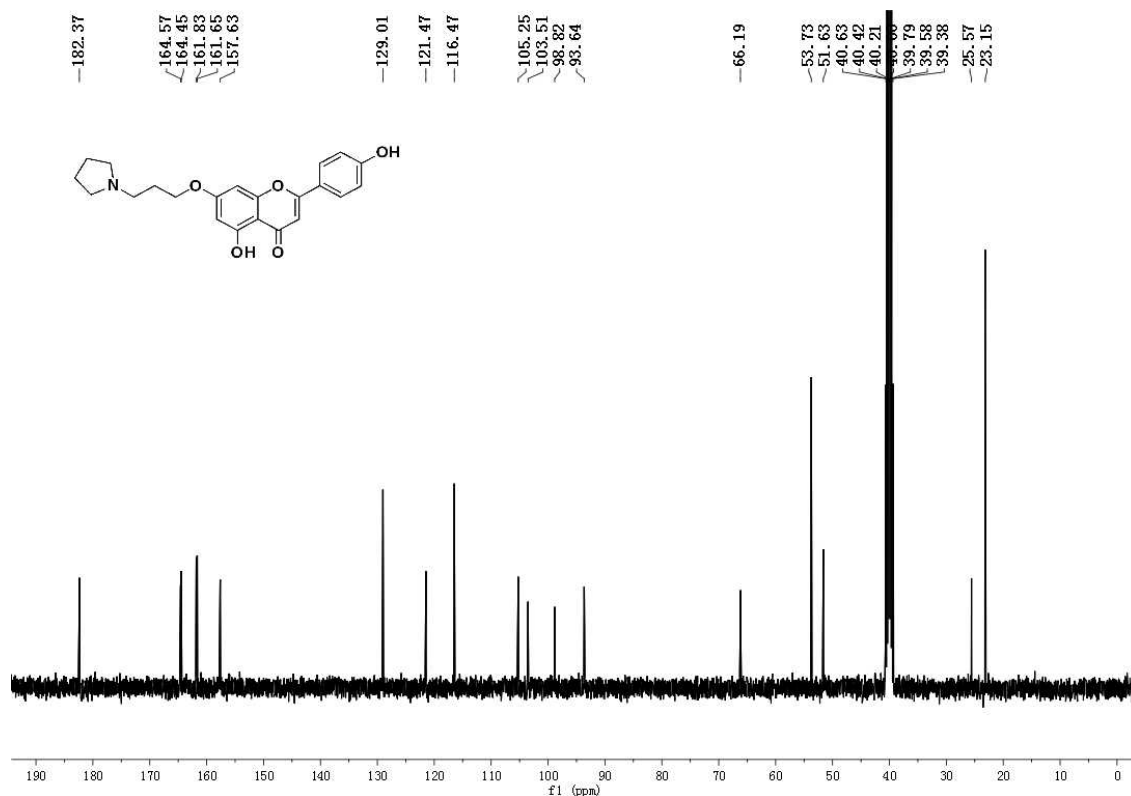

**Figure S41.**  $^1\text{H-NMR}$  spectrum (400 MHz,  $\text{DMSO-}d_6$ ) of 7-[3-(morpholin-4-yl)propoxy]-5-hydroxy-2-(4-hydroxyphenyl)-4H-chromen-4-one **4i**.

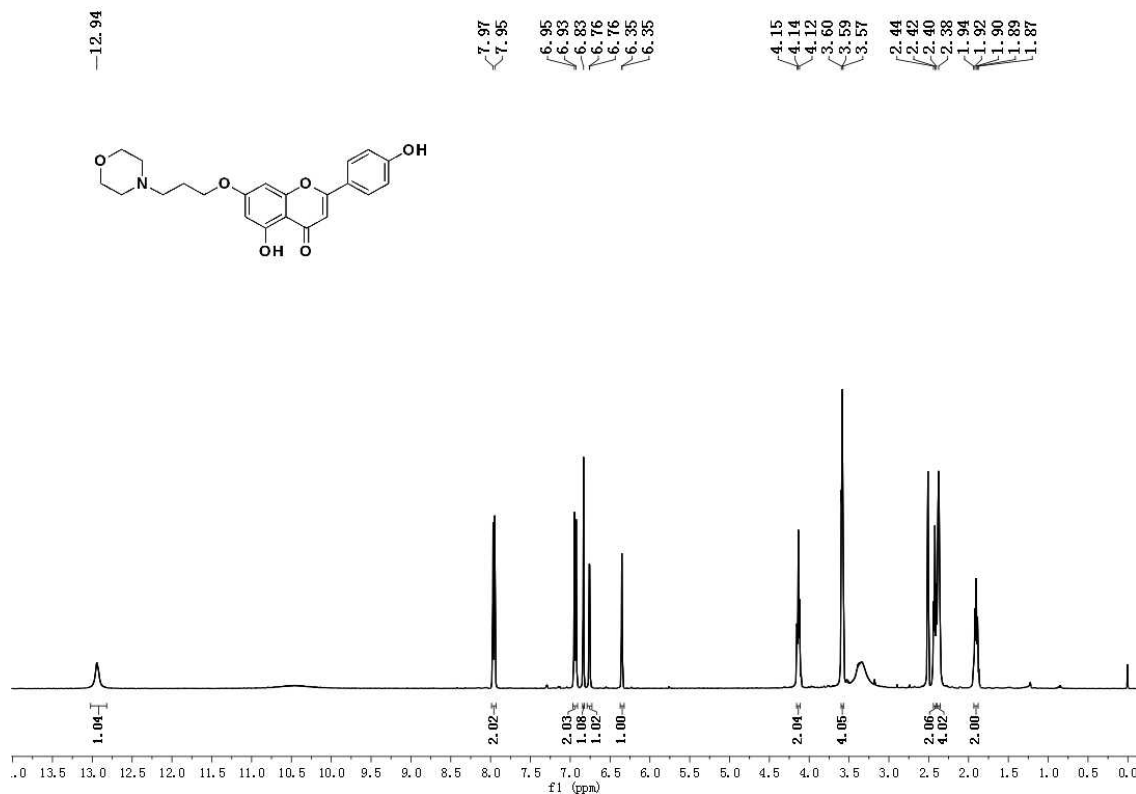

**Figure S42.**  $^{13}\text{C-NMR}$  spectrum (100 MHz,  $\text{DMSO-}d_6$ ) of 7-[3-(morpholin-4-yl)propoxy]-5-hydroxy-2-(4-hydroxyphenyl)-4H-chromen-4-one **4i**.

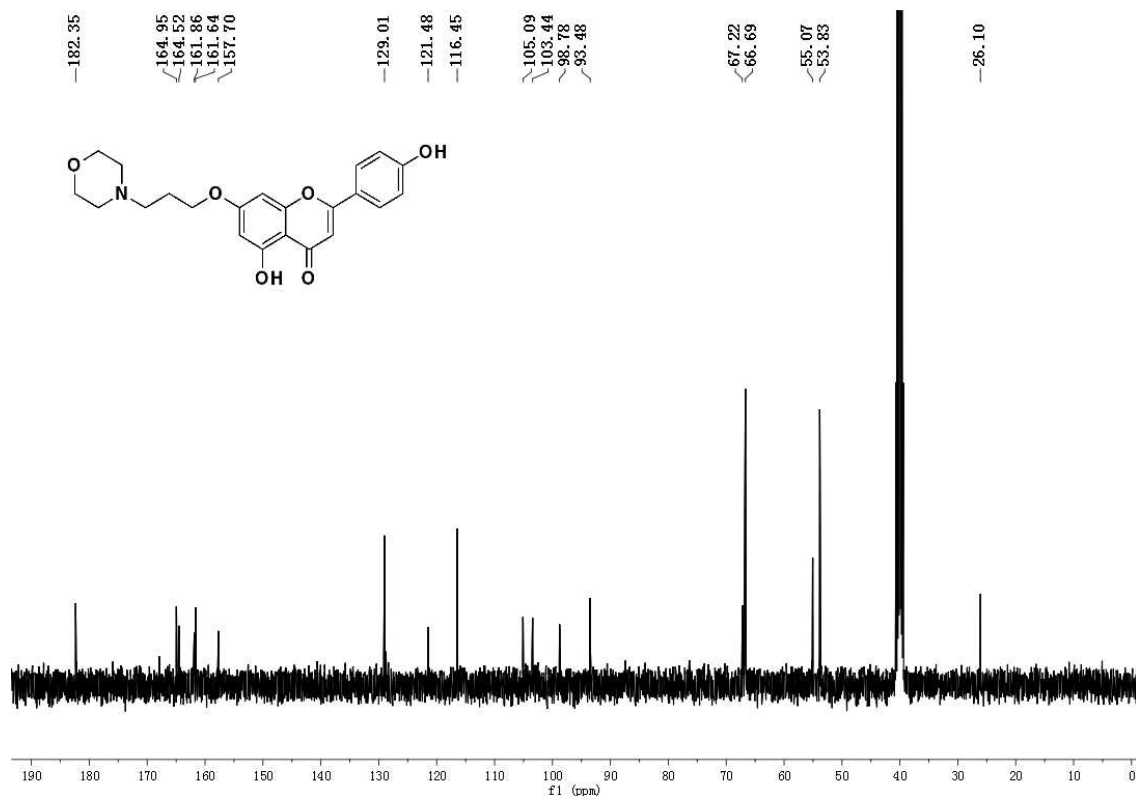

**Figure S43.**  $^1\text{H-NMR}$  spectrum (400 MHz,  $\text{DMSO-}d_6$ ) of 7-[3-(piperazin-1-yl)propoxy]-5-hydroxy-2-(4-hydroxyphenyl)-4H-chromen-4-one **4j**.

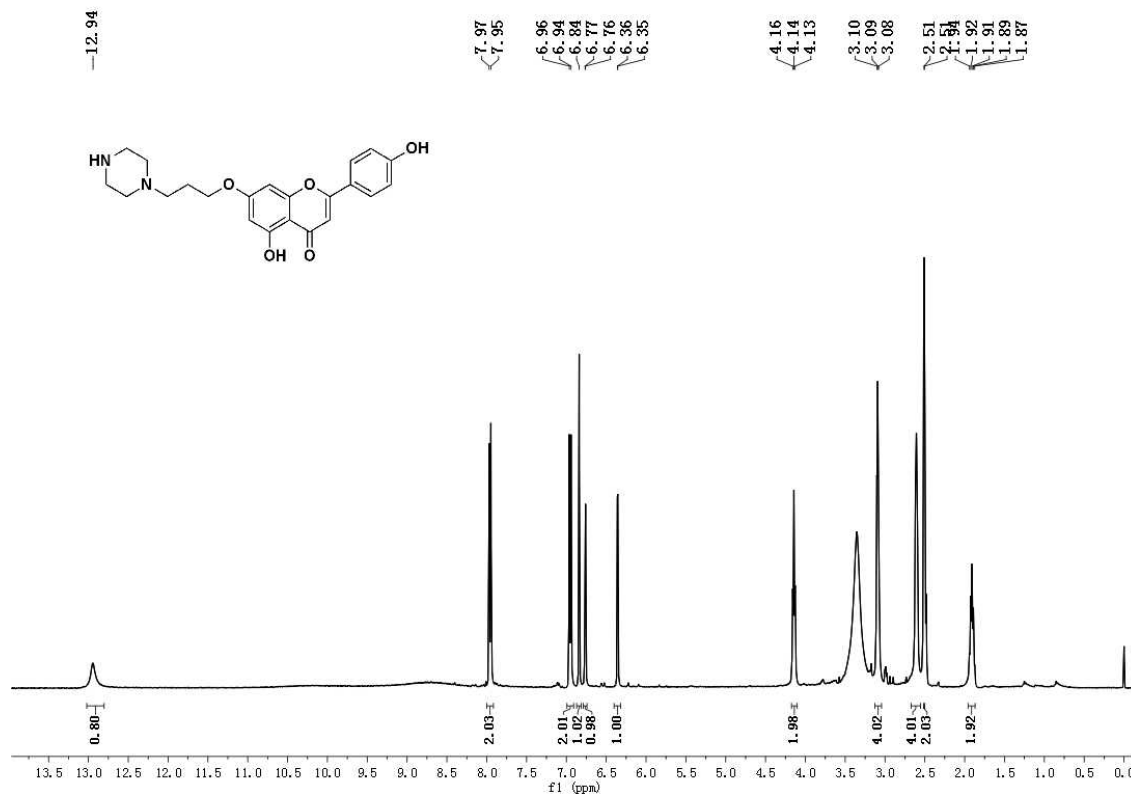

**Figure S44.**  $^{13}\text{C-NMR}$  spectrum (100 MHz,  $\text{DMSO-}d_6$ ) of 7-[3-(piperazin-1-yl)propoxy]-5-hydroxy-2-(4-hydroxyphenyl)-4H-chromen-4-one **4j**.

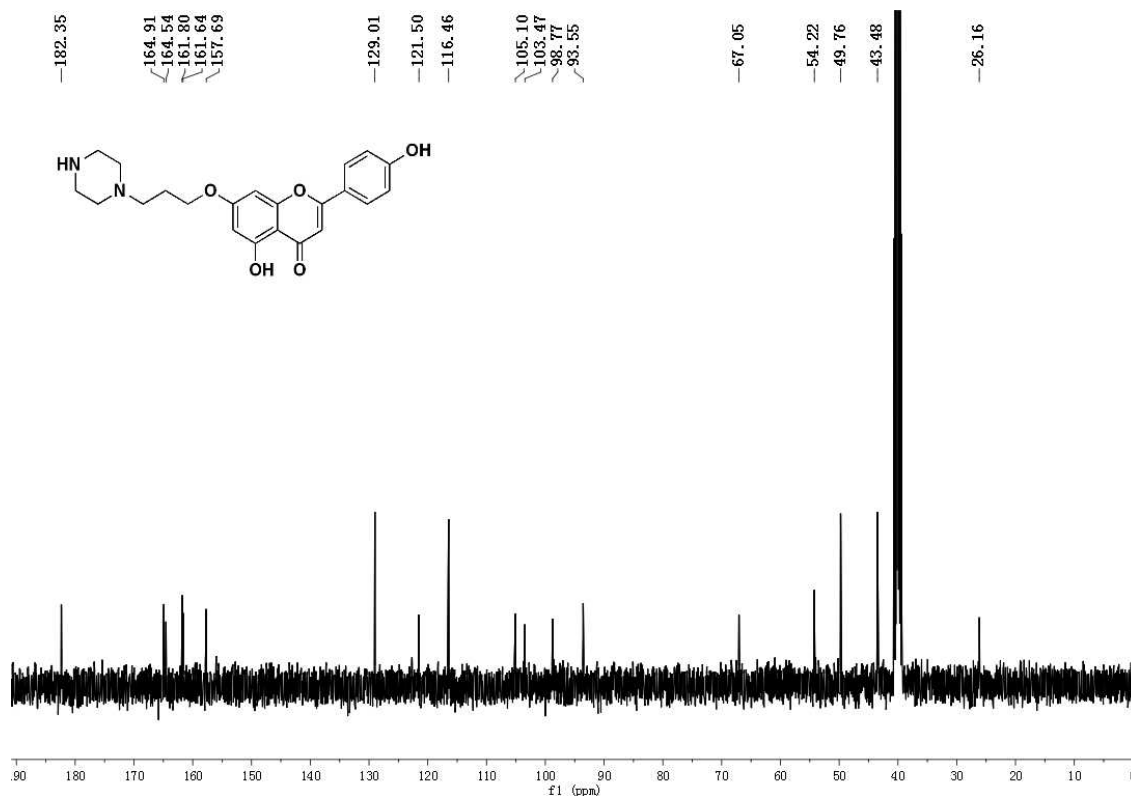

**Figure S45.**  $^1\text{H-NMR}$  spectrum (500 MHz,  $\text{DMSO-}d_6$ ) of apigenin (1).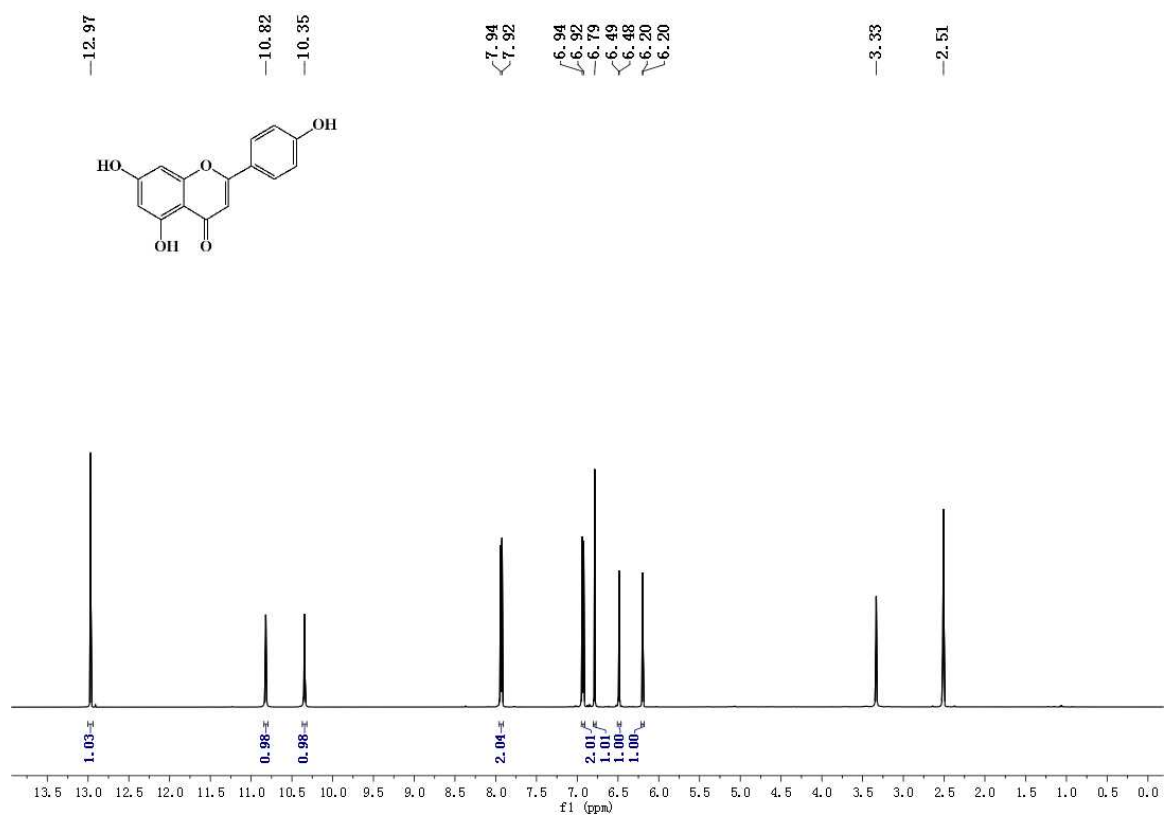**Figure S46.**  $^{13}\text{C-NMR}$  spectrum (125 MHz,  $\text{DMSO-}d_6$ ) of apigenin (1).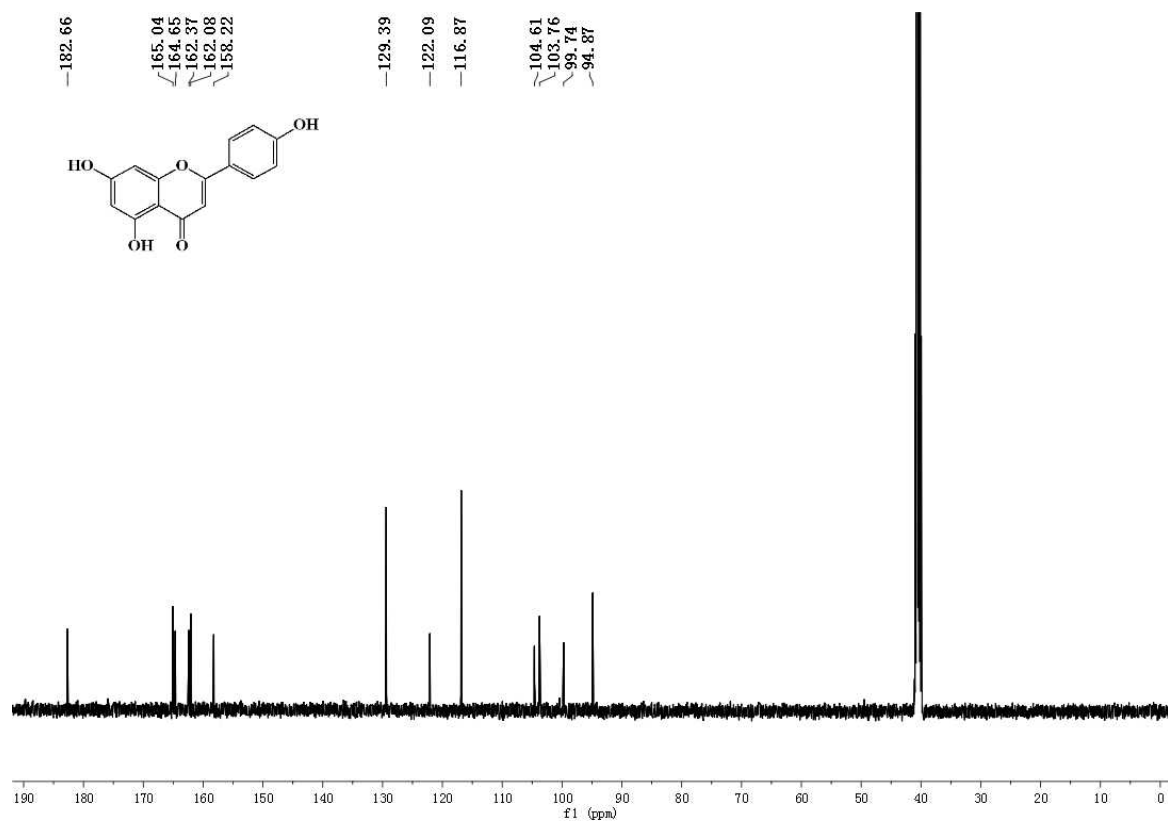

Supplement: molecules-18-11496-s001.pdf [file molecules-18-11496-s001.pdf]
